# Supplementary material
Source: PubMed Central journal article supplement (PMC6055164)
Supplement: pnas.1801997115.sapp.pdf [file pnas.1801997115.sapp.pdf]

| Table S1: datasets used          |                          |                       |                      |                                                                                                                                            |            |
|----------------------------------|--------------------------|-----------------------|----------------------|--------------------------------------------------------------------------------------------------------------------------------------------|------------|
| Species                          | common name <sup>1</sup> | Kingdom               | Phylum/class         | Dataset number                                                                                                                             | Reference  |
| <i>Amphimedon queenslandica</i>  | sponge                   | Metazoa               | Porifera             | SRR1511621                                                                                                                                 | (1)        |
| <i>Nematostella vectensis</i>    | starlet sea anemone      | Metazoa               | Cnidaria             | SRR836055                                                                                                                                  | (2)        |
| <i>Danio rerio</i>               | zebrafish                | Metazoa               | Chordata/Actinopteri | SRR2733359                                                                                                                                 | -          |
| <i>Xenopus tropicalis</i>        | tropical clawed frog     | Metzoa                | Chordata/Amphibia    | SRR2105090, SRR1795664                                                                                                                     | (3, 4)     |
| <i>Sarcophilus harrisii</i>      | Tasmanian devil          | Metazoa               | Chordata/Mammalia    | SRR1793358                                                                                                                                 | -          |
| <i>Homo sapiens</i>              | human                    | Metazoa               | Chordata/Mammalia    | ERR789216                                                                                                                                  | -          |
| <i>Anopheles gambiae</i>         | African malaria mosquito | Metazoa               | Arthropoda/Insecta   | ERX502992                                                                                                                                  | -          |
| <i>Coboldia fuscipes</i>         |                          | Metazoa               | Arthropoda/Insecta   | SRR5559333, SRR5559334                                                                                                                     | -          |
| <i>Proctacanthus coquilletti</i> |                          | Metazoa               | Arthropoda/Insecta   | SRR4346725                                                                                                                                 | -          |
| <i>Drosophila melanogaster</i>   | Fruit fly                | Metazoa               | Arthropoda/Insecta   | SRR070395, SRR1197414                                                                                                                      | -          |
| <i>Caenorhabditis elegans</i>    | nematode                 | Metazoa               | Nematoda             | SRX1130124                                                                                                                                 | -          |
| <i>Trichuris muris</i>           |                          | Metazoa               | Nematoda             | ERR279681                                                                                                                                  | -          |
| <i>Crassostrea gigas</i>         | pacific oyster           | Metazoa               | Mollusca             | SRR334212, SRR497890                                                                                                                       | (5, 6)     |
| <i>Capsaspora owczarzaki</i>     |                          | N.A. <sup>2</sup>     |                      | SRR515464, SRR515465                                                                                                                       | -          |
| <i>Spizellomyces punctatus</i>   |                          | Fungi                 | Chytridiomycota      | SRX096917                                                                                                                                  | -          |
| <i>Lichtheimia corymbifera</i>   |                          | Fungi                 | Zygomycota           | ERX300995                                                                                                                                  | -          |
| <i>Rhizopus delemar</i>          |                          | Fungi                 | Mucoromycota         | SRR1013688                                                                                                                                 | -          |
| <i>Ustilago maydis</i>           |                          | Fungi                 | Basidiomycota        | ERX159409, ERR184023, SRR3038908, SRR5002417                                                                                               | (7)        |
| <i>Cryptococcus neoformans</i>   |                          | Fungi                 | Basidiomycota        | SRR1796376, SRR1796479, SRR1797881, SRR1797885                                                                                             | (8)        |
| <i>Lachancea kluyveri</i>        |                          | Fungi                 | Ascomycota           | SRP129038                                                                                                                                  | This study |
| <i>Neurospora crassa</i>         |                          | Fungi                 | Ascomycota           | SRR100067, SRR1043827, SRR1055985, SRR1562549, SRR1588284, SRX042065                                                                       | (9-11)     |
| <i>Fusarium graminearum</i>      |                          | Fungi                 | Ascomycota           | SRR1185280, SRR1596060, SRR1772865, SRR3168567, SRR3203806, SRR4372406                                                                     | (12-14)    |
| <i>Aspergillus fumigatus</i>     |                          | Fungi                 | Ascomycota           | SRR1171330                                                                                                                                 | -          |
| <i>Dictyostelium discoideum</i>  | slime mold               | N.A. <sup>2</sup>     | Amoebozoa            | SRX256341, SRX256342, SRX757000, SRR867011, SRR867006, SRR1593424, SRR1593442, SRR1593443, SRR5099646, SRR5099649, SRR5099652, SRR5099655, | (15-19)    |
| <i>Arabidopsis thaliana</i>      | thale cress              | Viridiplantae         | Streptophyta         | ERR754085, ERX546050, SRR1773578, SRX1166222                                                                                               | -          |
| <i>Oryza sativa</i>              | rice                     | Viridiplantae         | Streptophyta         | SRR1952788, SRR1952808, SRR1976517                                                                                                         | (20, 21)   |
| <i>Pinus lambertiana</i>         | sugar pine               | Viridiplantae         | Streptophyta         | SRR3723921                                                                                                                                 | -          |
| <i>Physcomitrella patens</i>     | spreading earthmoss      | Viridiplantae         | Bryophyta            | SRR1798064, SRR1798065, SRR1798066, SRR1798067, SRR2225590                                                                                 | (22)       |
| <i>Chlamydomonas reinhardtii</i> | green alga               | Viridiplantae         | Chlorophyta          | ERR1000644, ERR1000645                                                                                                                     | -          |
| <i>Phytophthora infestans</i>    |                          | SAR <sup>3</sup>      | Oomycetes            | SRR5208985, SRR5208986, SRR5208987, SRR5208988, SRR5209018                                                                                 | -          |
| <i>Tetrahymena thermophila</i>   |                          | SAR <sup>3</sup>      | Ciliophora           | SRR5077779, SRR3470619 SRR3145125                                                                                                          | (23-25)    |
| <i>Leishmania donovani</i>       |                          | Excavata <sup>3</sup> | Euglenozoa           | SRR5272531, SRR5272535                                                                                                                     | (26)       |

|                              |  |                       |                   |                                    |      |
|------------------------------|--|-----------------------|-------------------|------------------------------------|------|
| <i>Trichomonas vaginalis</i> |  | Excavata <sup>3</sup> | Metamonada        | SRR5004966, SRR5004967, SRR1156251 | (27) |
| <i>Giardia intestinalis</i>  |  | Excavata <sup>3</sup> | Sarcomastigophora | SRR445165, SRR445166               | (28) |

<sup>1</sup> If available

<sup>2</sup> N.A: Not applicable. Dictyostelium and Capsaspora fall between kingdoms.

<sup>3</sup> Although not officially a kingdom, SAR and Excavata are unranked clades equivalent to one.

1. Gaiti F, *et al.* (2015) Dynamic and Widespread lncRNA Expression in a Sponge and the Origin of Animal Complexity. *Mol Biol Evol* 32(9):2367-2382.
2. Schwaiger M, *et al.* (2014) Evolutionary conservation of the eumetazoan gene regulatory landscape. *Genome Res* 24(4):639-650.
3. Owens NDL, *et al.* (2016) Measuring Absolute RNA Copy Numbers at High Temporal Resolution Reveals Transcriptome Kinetics in Development. *Cell Rep* 14(3):632-647.
4. Marletaz F, Maeso I, Faas L, Isaacs HV, & Holland PW (2015) Cdx ParaHox genes acquired distinct developmental roles after gene duplication in vertebrate evolution. *BMC Biol* 13:56.
5. Zhao X, Yu H, Kong L, & Li Q (2012) Transcriptomic responses to salinity stress in the Pacific oyster *Crassostrea gigas*. *PLoS One* 7(9):e46244.
6. Zhang G, *et al.* (2012) The oyster genome reveals stress adaptation and complexity of shell formation. *Nature* 490(7418):49-54.
7. Sanchez-Arreguin JA, Hernandez-Onate MA, Leon-Ramirez CG, & Ruiz-Herrera J (2017) Transcriptional analysis of the adaptation of *Ustilago maydis* during growth under nitrogen fixation conditions. *J Basic Microbiol* 57(7):597-604.
8. Gonzalez-Hilarion S, *et al.* (2016) Intron retention-dependent gene regulation in *Cryptococcus neoformans*. *Sci Rep* 6:32252.
9. Pedro Goncalves A, *et al.* (2015) Transcription profiling of the *Neurospora crassa* response to a group of synthetic (thio)xanthenes and a natural acetophenone. *Genom Data* 4:26-32.
10. Wu C, *et al.* (2014) Genome-wide characterization of light-regulated genes in *Neurospora crassa*. *G3 (Bethesda)* 4(9):1731-1745.
11. Wang B, *et al.* (2015) A transcriptomic analysis of *Neurospora crassa* using five major crop residues and the novel role of the sporulation regulator *rca-1* in lignocellulase production. *Biotechnol Biofuels* 8:21.
12. Ipcho S, *et al.* (2016) Fungal Innate Immunity Induced by Bacterial Microbe-Associated Molecular Patterns (MAMPs). *G3 (Bethesda)* 6(6):1585-1595.
13. Bui DC, *et al.* (2016) Heat shock protein 90 is required for sexual and asexual development, virulence, and heat shock response in *Fusarium graminearum*. *Sci Rep* 6:28154.
14. Son H, Park AR, Lim JY, Shin C, & Lee YW (2017) Genome-wide exonic small interference RNA-mediated gene silencing regulates sexual reproduction in the homothallic fungus *Fusarium graminearum*. *PLoS Genet* 13(2):e1006595.
15. Rosengarten RD, Santhanam B, Kokosar J, & Shaulsky G (2017) The Long Noncoding RNA Transcriptome of *Dictyostelium discoideum* Development. *G3 (Bethesda)* 7(2):387-398.
16. Rosengarten RD, *et al.* (2015) Leaps and lulls in the developmental transcriptome of *Dictyostelium discoideum*. *BMC Genomics* 16:294.
17. Platt JL, Rogers BJ, Rogers KC, Harwood AJ, & Kimmel AR (2013) Different CHD chromatin remodelers are required for expression of distinct gene sets and specific stages during development of *Dictyostelium discoideum*. *Development* 140(24):4926-4936.
18. Santhanam B, Cai H, Devreotes PN, Shaulsky G, & Katoh-Kurasawa M (2015) The GATA transcription factor *GtaC* regulates early developmental gene expression dynamics in *Dictyostelium*. *Nat Commun* 6:7551.
19. Miranda ER, *et al.* (2013) ABC transporters in *Dictyostelium discoideum* development. *PLoS One* 8(8):e70040.
20. Hummel AW, Wilkins KE, Wang L, Cernadas RA, & Bogdanove AJ (2017) A transcription activator-like effector from *Xanthomonas oryzae* pv. *oryzicola* elicits dose-dependent resistance in rice. *Mol Plant Pathol* 18(1):55-66.

21. Wilkins KE, Booher NJ, Wang L, & Bogdanove AJ (2015) TAL effectors and activation of predicted host targets distinguish Asian from African strains of the rice pathogen *Xanthomonas oryzae* pv. *oryzicola* while strict conservation suggests universal importance of five TAL effectors. *Front Plant Sci* 6:536.
22. Stevenson SR, *et al.* (2016) Genetic Analysis of *Physcomitrella patens* Identifies ABSCISIC ACID NON-RESPONSIVE, a Regulator of ABA Responses Unique to Basal Land Plants and Required for Desiccation Tolerance. *Plant Cell* 28(6):1310-1327.
23. Yan GX, *et al.* (2016) Cyc17, a meiosis-specific cyclin, is essential for anaphase initiation and chromosome segregation in *Tetrahymena thermophila*. *Cell Cycle* 15(14):1855-1864.
24. Yan GX, Zhang J, Shodhan A, Tian M, & Miao W (2016) Cdk3, a conjugation-specific cyclin-dependent kinase, is essential for the initiation of meiosis in *Tetrahymena thermophila*. *Cell Cycle* 15(18):2506-2514.
25. Tian M, *et al.* (2017) Nonsense-mediated mRNA decay in *Tetrahymena* is EJC independent and requires a protozoa-specific nuclease. *Nucleic Acids Res* 45(11):6848-6863.
26. Cuypers B, *et al.* (2017) Multiplexed Spliced-Leader Sequencing: A high-throughput, selective method for RNA-seq in Trypanosomatids. *Sci Rep* 7(1):3725.
27. Song MJ, *et al.* (2017) Epigenome mapping highlights chromatin-mediated gene regulation in the protozoan parasite *Trichomonas vaginalis*. *Sci Rep* 7:45365.
28. Franzen O, *et al.* (2013) Transcriptome profiling of *Giardia intestinalis* using strand-specific RNA-seq. *PLoS Comput Biol* 9(3):e1003000.

Figure S1. Protein sequence alignment that include protein sequences from five diverse plant species including: two splice isoforms of *Arabidopsis thaliana* (At), the moss *Physcomitrella patens* (Pp), and the alga *Chlamydomonas reinhardtii* (Cr) as well as duplicated genes from *Oryza sativa* (Os; rice) and *Pinus lambertiana* (Pl; pine). Sequences were aligned using Clustal Omega. The sequences from the land plants (all but Cr) share a Zn finger that is not in the algal sequence or in animals and fungi (CxxCxxxxxxxxCxxC; conserved cysteines underlined in the consensus sequence). Letters in bold span an exon junction.

```

AtHbs1      1  MP---RKGLSNFDDYDDGFDDDDDD-----AFDYDYDVDIDE---HEEE-----A
AtSki7      1  MP---RKGLSNFDDYDDGFDDDDDD-----AFDYDYDVDIDE---HEEE-----A
OsHbs1      1  MP---RKVVVS-GPDYDDEYNDDYD-----EYDEDYDDYGGT----GHSDDLIQHPTKE
OsSki7      1  -----MFIPELID
PlHbs1      1  MP---RKIK--HHDYEDVYDDSYD---Y-DEEYDYDYDDNEES---AECH-----
PlSki7      1  -----MAKY--QHDYEEYLEEYE--CYY-DSAYDYGYNDSQD---GITNGLTSSDDFN
PpHbs1      1  MP---RKWR--QSDFDDDGYYDDYDEEYEEYLEDKKEPTSTSSVVPGQSQSFTS-TTQ
PpSki7      1  MP---RKWR--QSDFDDDGYYDDYDEEYEEYLEDKKEPTSTSSVVPGQSQSFTS-TTQ
CrHbs1      1  MTKGKRGAFYDDDDLDDGYDDDYDD-DYYEEEPAPAPKKAEE-----LAKPQ--
CrSki7      1  MTKGKRGAFYDDDDLDDGYDDDYDD-DYYEEEPAPAPKKAEE-----LAKPQ--
consensus  1  mp   rkg      dydd yddyd   yy de yd dyd           g   i

```

```

AtHbs1      39 -AAEPKEEIAKTQGLWRCAICTYDNVETMFVCDICGVLRHPVAGNQSINKNT-----
AtSki7      39 -AAEPKEEIAKTQGLWRCAICTYDNVETMFVCDICGVLRHPVAGNQSINKNTDVFYAVES
OsHbs1      45 -KESSKSSSMVPLVLRCSMCMFDNHESMVYCEMCGVFRFSFMKSAKDGSI--KVHG---
OsSki7      8  -NRSDPQEPSPRNPGIWQCTICEHGNDAKKKSCQCQGLRYFSLYFNNALEVDGRAKR---
PlHbs1      39 -DLSKVENLNRQADVWHCSICTYKNPENRSACDMCGVIRNASLEGCQTAAATIKDMP--K
PlSki7      47 GNVIKVDQCNVPPVYWHCTACKYDNPELSVCDICGVLYNASLAASQTALTNDTVNE--T
PpHbs1      55 PTATEVNEPETEEGLWACPVCTFDNSLDSLTCDICDTPREDLSEKVS DPSTSSKEK---
PpSki7      55 PTATEVNEPETEEGLWACPVCTFDNSLDSLTCDICDTPREDLSEKVS DPSTSSKEK-AYV
CrHbs1      46 -----A-----GGKQPAQTAPKAAPSAA
CrSki7      46 -----A-----GGKQPAQTAPKAAPSAA
consensus  61          glwrc  ictydn e m  cdicgvlr      g n g      k

```

```

AtHbs1      90 -----
AtSki7      98 RCKEPVVSKLAKSLFGSVPSNPKRAVLCLPEHTNL---VMEQ-----G
OsHbs1      99 -----
OsSki7      64 RDKHYAVSVLARTLFSPPSSAKS-KDVVLSGG-----FKAS-----R
PlHbs1      96 SDLSEGQIKIWRCLCC--TYDNPEHISVCGICRTARKASFEQSQETASSETTDMPKADRSD
PlSki7      105 CRASQK-SVLAKSLFAGMSSQKPKQAKILQ-----Q-----IRDDLQSSKAD
PpHbs1      114 -----
PpSki7      114 VTEVQRVSP LAKALFNPLPGTKSDQATASLRSNMP-----V
CrHbs1      64 PARAAA-----KPD
CrSki7      64 PARAAGASKLAQSLCDPPPPGPGGKAQRGA-----KPD
consensus  121          s  laks  lf          a

```

```

AtHbs1      90 -----APFKFDAPSPDDLVSNGLTSSKT-----G--
AtSki7      139 PLPGISRGNIHDLY--KAF--SSKNSCVSIAPFKFDAPSPDDLVSNGLTSSKT-----G--
OsHbs1      99 -----IPSDFGTPSMPKSDSTKMPVNTR-----T--
OsSki7      99 NATGSTRATLDALH--KTYMTRKERHINIVPFKFDTPSPDDVATGLKSSRS-----F--
PlHbs1      154 GKSKIW-----RCL SCTYDNPEHVSACGM CSTIR SASLEESQ--
PlSki7      146 GYQGILCANFRDIQKFIAIPNSKSRNISIDPFKFDSPSPDDMVLEGKH-----
PpHbs1      111 -----VPFKFDTPSPDEKNLAARGLKKSPIRVAQSP
PpSki7      150 LYQKSW-----GKVADSSSFSSKIVPFKFDTPSPDEKNLAARGLKKSPIRVAQSP
CrHbs1      73 PAVKS-----LHQ-PTY-PVAPAATSSSPFQFDTPSPDDAVKAAQERKPGAVAPPA--
CrSki7      97 PAVKS-----LHQ-PTY-PVAPAATSSSPFQFDTPSPDDAVKAAQERKPGAVAPPA--
consensus  181          1          vpfkfdtPspdd v g      t

```

AtHbs1 114 -PK**GS**GDASMR**Q**KEK-----QD**S**VEQ**K**PL**K**KG**D**---S**S**ETSS**R**GRH**D**KL**D**DK**GG**  
 AtSki7 189 -PK**GS**GDASMR**Q**KEK-----QD**S**VEQ**K**PL**K**KG**D**---S**S**ETSS**R**GRH**D**KL**D**DK**GG**  
 OsHbs1 123 -TDF**GG**DPE**I**KN-----A**S**IS**H**E**K****V**---G**S**-----T**Q**YAS**V**GS**SS**SG  
 OsSki7 150 -R**K****V**DT**D**A**P**H**V**T**E**-----K**R****V**MD**N**DS---S**T**PE**K**-----D-----  
 PlHbs1 191 -A**S**A**S**G**T**A**A**M**S**N**P**A**S**T**T**K**K**A**S**L**D**I**T**A**K****V**E**A**E**I****V**E**D**N**A**K---S---S**K**---E---P**A**P  
 PlSki7 194 -A**T**G**K**T**A**A**A**K**S**N**S**S**S**A**T**P**T**S**S**L---S**N**N**V**E**G**E**V**E**A**Q**E**T**R**---S**V**V**Q****K****Q**---A**L**T**S**T**A**L  
 PpHbs1 142 D**D**I**L**N**G**A**R**S**S**M**A**K**A**G**T**S-----K**S**I**S**S**A**V-----SK**L**N**V**P**G**L  
 PpSki7 200 D**D**I**L**N**G**A**R**S**S**M**A**K**A**G**T**S-----K**S**I**S**S**A**V-----SK**L**N**V**P**G**L  
 CrHbs1 122 -A**A**A**A**P**T**A**P**S**L**P---Q**N**K**N**F**L**R**P**S**P**M**L**Q**Q**Q**K**Q**Q**Q**G**P**A**N**G**E**G**A**D**E**A**A**R**G**V**-A**A**L**G**L**T**S**A**  
 CrSki7 146 -A**A**A**A**P**T**A**P**S**L**P---Q**N**K**N**F**L**R**P**S**P**M**L**Q**Q**Q**K**Q**Q**Q**G**P**A**N**G**E**G**A**D**E**A**A**R**G**V**-A**A**L**G**L**T**S**A**  
 consensus 241 a g g a q sv l g s r l gg

AtHbs1 160 A-----G**G**I**K**S**G**K**S**L**P**K**A**K**A**D**M**S**N**E**T**S---S**S**S**K**Y**M**E**T**S**E**S**L**T**G**T**M**N**K**M**S**-L**I**G**E**T**E**-----  
 AtSki7 235 A-----G**G**I**K**S**G**K**S**L**P**K**A**K**A**D**M**S**N**E**T**S---S**S**S**K**Y**M**E**T**S**E**S**L**T**G**T**M**N**K**M**S**-L**I**G**E**T**E**-----  
 OsHbs1 155 A-----G-----K**K**L---K**E**D**Q**S**S**R**A**T---S**S**A**Q**N**E**D**V**A**Q**K**L**S**S**D**I**Q**K**L**G**-L-----  
 OsSki7 176 -----T**T**A**D**S**N**L**P**V**K**S**N**E**F**G**E**S**S**E**S**V**S**V**G**S**Q**N**E**T**L**C**L**D**H**E**L**Q**H**L**S**-L**E**-R**K**S-----  
 PlHbs1 235 S-----S**L**S**K**A**D**K**H**E**K**R**E**N**G**-V**L**R**E**D**K**S**S**S**N**G-----L**V**S**E**E**L**Q**K**L**S**F**S**T**G**Y**N**F-----  
 PlSki7 243 P-----I**V**N**R**T**D**K**K**Q**K**E**A**G**R**F**L**G**Q**Q**E**A**L**-----S**D**R--T**S**E**G**T**A**G**D**H**E**-----  
 PpHbs1 174 S--Q**S**S**G**A**S**T**S**E**S**H-----V**G**N**G**S**S**S**A**P**E**G-----E**L**A**D**A**L**K**Q**M**N**-V**G**G**D**Y**M**E**S**K**S**R  
 PpSki7 232 S--Q**S**S**G**A**S**T**S**E**S**H-----V**G**N**G**S**S**S**A**P**E**G-----E**L**A**D**A**L**K**Q**M**N**-V**G**G**D**Y**M**E**S**K**S**R  
 CrHbs1 176 A**S**G**S**E**G**G**T**P**P**G**G**G**T**R**Q**H-----P**H**L**G**H**P**E---A**P**N**A**L**S**H**P**G**G**L**H**G**L**H**T**-----  
 CrSki7 200 A**S**G**S**E**G**G**T**P**P**G**G**G**T**R**Q**H-----P**H**L**G**H**P**E---A**P**N**A**L**S**H**P**G**G**L**H**G**L**H**T**-----  
 consensus 301 a ggt k k s g e lt lnkm l g

AtHbs1 208 -N**S**S**D**I**K**I**R**G**P**K**S**Q**S**K**H**K**P**E**E**W-----M**L**L**D**K**E**S**D**A**L**S**Q**L**N**L**A**I**V**G**H**V  
 AtSki7 283 -N**S**S**D**I**K**I**R**G**P**K**S**Q**S**K**H**K**P**E**E**W-----M**L**L**D**K**E**S**D**A**L**S**Q**L**N**L**A**I**V**G**H**V  
 OsHbs1 190 -E**K**N**E**V**D**T**A**K**P**Y**L**P**E**E**Y**K**P**E**K**W-----M**F**A**N**E**S**G**V**L**S**Q**L**N**L**A**I**V**G**H**V**  
 OsSki7 221 -Q**K**S**K**A**N**I**K**K**P**V**S**S**S**L**Y**K**P**E**P**W-----M**L**Q**H**E**D**E**G**I**P**R**Q**L**N**L**A**I**V**G**H**V  
 PlHbs1 278 -H**N**S**N**K**V**L**K**N**A**V**P**L**E**E**Y**K**A**E**P**W-----M**L**H**E**Q**S**D**E**G**K**N**L**L**H**L**A**I**V**G**H**V  
 PlSki7 280 -Q**R**N**P**S**N**L**K**K**V**L**P**L**E**E**Y**K**P**E**S**W-----M**L**V**E**E**K**E**P**Y**K**S**L**L**H**L**A**I**V**G**H**V  
 PpHbs1 218 E**N**A**D**A**S**T**S**T**Y**G**L**S**L**E**S**Y**E**P**E**P**W**-----M**L**K**D**A**N**K**D**S**R**Q**L**L**H**L**I**V**V**G**H**V  
 PpSki7 276 E**N**A**D**A**S**T**S**T**Y**G**L**S**L**E**S**Y**E**P**E**P**W**-----M**L**K**D**A**N**K**D**S**R**Q**L**L**H**L**I**V**V**G**H**V  
 CrHbs1 218 -----R**R****P**V**T**E**Y**V**M**E**A**D**L**A**R**D**V**A**A**A**T**A**S**E**S**S**T**S**T**S**G**S**S**S**G**S**S**K**P**P**L**H**L**V**V**L**G**H**V**  
 CrSki7 242 -----R**R****P**V**T**E**Y**V**M**E**A**D**L**A**R**D**V**A**A**A**T**A**S**E**S**S**T**S**T**S**G**S**S**S**G**S**S**K**P**P**L**H**L**V**V**L**G**H**V**  
 consensus 361 n ir vpleeykpE w ml d k LhLaiVGHV

AtHbs1 250 D**S**G**K**S**T**L**S**G**R**L**L**H**L**L**G**R**I**S**Q**K**Q**M**H**K**Y**E**K**E**A**K**I**L**Q**G**K**G**S**F**A**Y**A**W**A**L**D**E**S**A**E**E**R**E**R**G**I**T**M**T**V**A  
 AtSki7 325 D**S**G**K**S**T**L**S**G**R**L**L**H**L**L**G**R**I**S**Q**K**Q**M**H**K**Y**E**K**E**A**K**I**L**Q**G**K**G**S**F**A**Y**A**W**A**L**D**E**S**A**E**E**R**E**R**G**I**T**M**T**V**A  
 OsHbs1 232 D**S**G**K**S**T**L**S**G**R**L**L**H**L**L**G**R**I**S**K**K**D**M**H**K**N**E**K**E**A**K**E**K**G**K**G**S**F**A**Y**A**W**A**M**D**E**S**E**E**R**E**R**G**V**T**M**T**V**A  
 OsSki7 263 D**S**G**K**S**T**L**C**G**R**L**L**H**A**L**G**R**I**S**K**K**Q**M**H**K**Y**E**K**E**A**K**E**K**G**K**G**S**F**A**Y**A**W**A**M**D**E**S**A**D**E**R**E**R**G**I**T**M**T**V**G**  
 PlHbs1 320 D**A**G**K**S**T**L**T**G**R**L**L**H**L**M**G**R**V**S**Q**K**E**M**H**K**Y**Q**R**E**A**K**Q**K**G**K**E**S**F**A**Y**A**W**L**D**E**S**T**E**E**R**E**R**G**V**T**M**T**V**A  
 PlSki7 322 D**A**G**K**S**T**M**G**R**L**L**H**L**M**G**V**S**E**K**M**R**K**Y**E**R**E**A**K**Q**K**G**K**G**S**F**A**Y**A**W**V**L**D**E**S**A**E**E**R**E**R**G**L**T**M**T**V**A  
 PpHbs1 261 D**A**G**K**S**T**L**M**G**R**I**L**H**L**L**G**R**V**S**Q**K**E**M**H**K**N**E**K**S**K**Q**Q**G**K**G**S**F**A**Y**A**F**V**L**D**E**G**A**E**E**R**A**R**G**V**T**M**T**V**A  
 PpSki7 319 D**A**G**K**S**T**L**M**G**R**I**L**H**L**L**G**R**V**S**Q**K**E**M**H**K**N**E**K**S**K**Q**Q**G**K**G**S**F**A**Y**A**F**V**L**D**E**G**A**E**E**R**A**R**G**V**T**M**T**V**A  
 CrHbs1 268 D**A**G**K**S**S**L**M**G**R**L**L**H**D**L**G**L**V**S**A**K**E**A**H**K**F**Q**R**D**A**A**A**A**G**K**G**S**F**A**W**A**W**L**D**E**R**P**E**E**R**E**R**G**V**T**M**D**V**A  
 CrSki7 292 D**A**G**K**S**S**L**M**G**R**L**L**H**D**L**G**L**V**S**A**K**E**A**H**K**F**Q**R**D**A**A**A**A**G**K**G**S**F**A**W**A**W**L**D**E**R**P**E**E**R**E**R**G**V**T**M**D**V**A  
 consensus 421 DaGKStlmGRllHllGrisqKemhKyekeak GKgSFAYAw lDEsaeERERgVtMtVa

AtHbs1 310 V**A**Y**F**N**S**K**R**H**H**V**V**L**L**D**S**P**G**H**K**D**F**V**P**N**M**I**A**G**A**T**Q**A**D**A**A**I**L**V**I**D**A**S**V**G**A**F**E**A**G**F**D**N**L**-----  
 AtSki7 385 V**A**Y**F**N**S**K**R**H**H**V**V**L**L**D**S**P**G**H**K**D**F**V**P**N**M**I**A**G**A**T**Q**A**D**A**A**I**L**V**I**D**A**S**V**G**A**F**E**A**G**F**D**N**L**-----  
 OsHbs1 292 V**A**Y**L**E**T**N**K**Y**R**V**V**L**L**D**S**P**G**H**K**D**F**V**P**N**M**I**S**G**A**T**Q**A**D**A**A**I**L**V**V**D**A**C**T**G**S**F**E**A**G**M**D**G**E**-----G  
 OsSki7 323 V**A**Y**F**D**T**K**N**Y**H**V**V**L**L**D**S**P**G**H**K**D**F**V**P**N**M**I**S**G**A**T**Q**S**D**A**A**I**L**V**I**D**A**S**I**G**S**F**E**A**G**M**G**I**N**-----  
 PlHbs1 380 V**A**H**F**D**T**V**K**F**H**V**V**L**L**D**S**P**G**H**K**D**F**V**P**N**L**I**V**G**A**S**Q**A**D**A**A**V**L**V**V**D**A**S**T**G**A**F**E**A**G**M**D**G**Q**-----  
 PlSki7 382 V**A**H**F**E**L**R**N**F**K**L**R**V**V**L**L**D**S**P**G**H**K**D**F**V**P**N**M**I**S**G**A**S**Q**A**D**A**A**V**L**V**I**D**A**S**I**G**A**F**E**A**G**M**Y**G**Q**-----  
 PpHbs1 321 V**A**H**F**E**T**P**K**L**R**V**V**L**L**D**A**P**G**H**R**D**F**V**P**N**M**I**S**G**A**S**Q**A**D**A**A**I**L**V**V**D**A**S**I**G**A**F**E**A**G**L**E**G**E**-----G  
 PpSki7 379 V**A**H**F**E**T**P**K**L**R**V**V**L**L**D**A**P**G**H**R**D**F**V**P**N**M**I**S**G**A**S**Q**A**D**A**A**I**L**V**V**D**A**S**I**G**A**F**E**A**G**L**E**G**E**-----G  
 CrHbs1 328 M**T**R**F**A**T**N**R**F**A**V**T**L**L**D**A**P**G**H**R**D**F**V**P**N**M**I**A**G**A**A**Q**A**D**A**A**L**L**L**V**D**G**S**P**G**G**F**E**A**G**F**S**E**G**S**G**L**H**G  
 CrSki7 352 M**T**R**F**A**T**N**R**F**A**V**T**L**L**D**A**P**G**H**R**D**F**V**P**N**M**I**A**G**A**A**Q**A**D**A**A**L**L**L**V**D**G**S**P**G**G**F**E**A**G**F**S**E**G**S**G**L**H**G  
 consensus 481 vahfet ryhVvLLDsPGhKDFVPNmIsGAtQaDAAiLvvDasvGafEAGmdg

AtHbs1 364 --KQGTREHARVLRGFGVEQVIVAINKMDIVGYSKERFDLIKQHVGSFLQSCRFKDSSLT  
AtSki7 439 --KQGTREHARVLRGFGVEQVIVAINKMDIVGYSKERFDLIKQHVGSFLQSCRFKDSSLT  
OsHbs1 348 KSVGQTKEHAQLIRSFQVEQLIVAVNKMDAIGYSKERFEFIKVLGSLRACNFKDSSVT  
OsSki7 377 GGIQGTKEHSQLVRSFGVDNLIVVAVNKMDSVESKERFNFIKSQLGAFRLSCGYKDSAVA  
PlHbs1 436 GTGGQTKEHAQLIRSFQVEQLIIAINKMDVVDYSKERFDFIKSQLGLFLRRCGFKESSIM  
PlSki7 438 -GEGQTKEHAQLIRSFQIEQLIIAVNKMDTVDKTEGRFCFIKSQLGPFLLRRCGFKESSTI  
PpHbs1 377 QGRGQGTREHAQLVRS LGVEQLIVAVNKLDVDFSKERFDFIRGTLQPFLLKQCGFKDGS LQ  
PpSki7 435 QGRGQGTREHAQLVRS LGVEQLIVAVNKLDVDFSKERFDFIRGTLQPFLLKQCGFKDGS LQ  
CrHbs1 388 APGGQGTREHAALARSLGIEQMAVVVSKLDTGCGYDQSRFESIRAALLPYLKS VGFKESGLQ  
CrSki7 412 APGGQGTREHAALARSLGIEQMAVVVSKLDTGCGYDQSRFESIRAALLPYLKS VGFKESGLQ  
consensus 541 GQTrEHaql1lRsfGveqlivavnKmDsvgyskeRfdIk qlgpfLrscgfkds1

AtHbs1 422 WIPLSAMENQNLVAAPS-DNRLSSWYQ--GPCLLDVAVDSVKSPDRDVSKPLLMPICDAVR  
AtSki7 497 WIPLSAMENQNLVAAPS-DNRLSSWYQ--GPCLLDVAVDSVKSPDRDVSKPLLMPICDAVR  
OsHbs1 408 WIPLSAVENQNLIKIPS-DVRLTSWYQ--GFCLLDAIDSLQLPSRDVSKPLILPICDVIK  
OsSki7 436 WVPISAMENENLMTTAS-DTRLSSWYD--GNCLLKAIDTLPPP SRDVSKPLRLPICDVFS  
PlHbs1 494 WIPMSVIENQNLVTSST-DGRILMSWYT--GPHFLESIDLFPPTTRDISRPLRIPISEVIQ  
PlSki7 495 WIPLSALDNQNLTSATS-DTRLNSWYS--GPYLLEAIDNLQPPKRDISRPLRLPISEVSK  
PpHbs1 436 WVPVSASEGQNL TMA-STE SALKAWYN--GPCLIELVDSLKPPRLVARPLRLTIAEVMK  
PpSki7 494 WVPVSASEGQNL TMA-STE SALKAWYN--GPCLIELVDSLKPPRLVARPLRLTIAEVMK  
CrHbs1 448 WLPAAGPLGENLVGPPQ-DPALKAWWGPRPCVTD AIDAFAPRERAVSRPLRLPVSDVFK  
CrSki7 472 WLPAAGPLGENLVGPPQ-DPALKAWWGPRPCVTD AIDAFAPRERAVSRPLRLPVSDVFK  
consensus 601 WiPlsamEnqNlv ps d rLssWy gpclldaiDsl pp RdvskPlrlpi dvvk

AtHbs1 479 STSQGQVSACGKLEAGAVRPGSKVMVMPSGD-QGTIRSLERDSQACTIARAGDNVALALQ  
AtSki7 554 STSQGQVSACGKLEAGAVRPGSKVMVMPSGD-QGTIRSLERDSQACTIARAGDNVALALQ  
OsHbs1 465 SQSTGQLAAF GKLE TGAI RIGSKVLISPCGE-VATVKS IERDSNSCDIARAGDNVAVSLQ  
OsSki7 493 SHKLGQVAIGGKVEVGATRSGSKILVMPFGE-LAVVKTIERNSSSCNLARAGDNVAIGLQ  
PlHbs1 551 SRTLQQAASGKLDAGAIKVGTKLLVMPAGQ-GAIVKAI EQDGNELNIAKAGDSVDIGLQ  
PlSki7 552 SRS LGQVAISGKLEGGALKIGTKVLVMPAGV-VATVKAIEQDTQVCAVARAGDNVDIALQ  
PpHbs1 493 TRTLGPSAFGGKLES GAIHSGTKVRVMPSGE-IATVKS IELQGGQLKTARAGEGV DVGLN  
PpSki7 551 TRTLGPSAFGGKLES GAIHSGTKVRVMPSGE-IATVKS IELQGGQLKTARAGEGV DVGLN  
CrHbs1 507 SK-TGAVVLGGKLEGGAMRPGSRVVLVPGPAQPF AVRSLEEVGGGAANLARAGDSCEVALV  
CrSki7 531 SK-TGAVVLGGKLEGGAMRPGSRVVLVPGPAQPF AVRSLEEVGGGAANLARAGDSCEVALV  
consensus 661 shslGqvaigGKleaGAvr GskvmvmP gd vatvkslErdgqacniArAGdnvdlalQ

AtHbs1 538 -----GIDANQVMAGDVLCHPDFPVS VATHLELMVLVLEGATPILLGSOLEFHVH  
AtSki7 613 -----GIDANQVMAGDVLCHPDFPVS VATHLELMVLVLEGATPILLGSOLEFHVH  
OsHbs1 524 -----GIDGSKLIAGGILCNPGFPVPSNFLELRVLDVITIPILIGYQVEFHIIH  
OsSki7 552 -----GIDPSHIMPGGVICHDPVPSVASCLELKLVLVDITVPIVLGQFELHIH  
PlHbs1 610 -----GIDSSILMTGGVLCHPDFPVPVARRIELKVAVLDIKQPILFGAEVELHAH  
PlSki7 611 -----GIDISFLMIGGVLCHPDYPVPIAIRIELRVVILDITMPILVGSQVELYIH  
PpHbs1 552 -----GIDPGMLAPGGVVCHPDYPVPVATRFEVQLLTLDIIRTPILKGSQVILHVH  
PpSki7 610 -----GIDPGMLAPGGVVCHPDYPVPVATRFEVQLLTLDIIRTPILKGSQVILHVH  
CrHbs1 566 AHGGGGGGGGAIDPSLVAPGAVLCHADFP AVLVTKFQRLRVLDVVPVLLRGQAVTLHAH  
CrSki7 590 AHGGGGGGGGAIDPSLVAPGAVLCHADFP AVLVTKFQRLRVLDVVPVLLRGQAVTLHAH  
consensus 721 giD s lmpGgvlChpdfvpvathlelrvlvldv iPiLlGsqvelhvH

AtHbs1 588 HAKEAATVVKLVAMLDPKTGQPTKKS PRCLTAKQSAMLEVS LQNPVCVETTFSES RALGRV  
AtSki7 663 HAKEAATVVKLVAMLDPKTGQPTKKS PRCLTAKQSAMLEVS LQNPVCVETTFSES RALGRV  
OsHbs1 574 HVKEAARVTKIVALLD-KAGKPSKTAPRFLKSKQNAV VQVTL DAPVCVEEFSKCRALGRA  
OsSki7 602 HAKVSASMVKILSLLEQKTGKASKKIPRFLTSRQTAVIEVKLEKEVCVEEFSNLKALGRV  
PlHbs1 660 HSKEAAKIVQIIA ILDPKTGLVRKKAPRLLTANQSALIEVLP HRGICIEEYCNYPKPLGRV  
PlSki7 661 HVREAAKVVQLLS ILDPKTGLVRKKAPRLTANQNALMEVVPDRGACIEEYNNYKALGRV  
PpHbs1 602 HARQPARVDQLVSLDDPKKGTVLRQRPRHLTANQSAIVVIVPDEGVCIEKYSDFRALGRI  
PpSki7 660 HARQPARVDQLVSLDDPKKGTVLRQRPRHLTANQSAIVVIVPDEGVCIEKYSDFRALGRI  
CrHbs1 626 VAREEGHLSALVALLDPRTEGEEVKARPRCLTRGQSALVEVTS SRGLVLEEYAHYRALGRV  
CrSki7 650 VAREEGHLSALVALLDPRTEGEEVKARPRCLTRGQSALVEVTS SRGLVLEEYAHYRALGRV  
consensus 781 hakeaarvv lvalldpktG kk PRcLta QsAmvevs drgvcevEeys yraLGRV

```
AtHbs1      648 FLRSSGRTVAMGKVTRIIQDS*--
AtSki7      723 FLRSSGRTVAMGKVTRIIQDS*--
OsHbs1      633 FLRSGSTIAVGVTRVLGQDN*
OsSki7      662 FLRSQGNTIAVGIVSRVREQA*--
PlHbs1      720 TLRATGKTIAVGIVTRIEQQ*--
PlSki7      721 TLRATGKTIAVGIVTRIEQQ*--
PpHbs1      662 ALREGGKTIAVGIVTDILERK*--
PpSki7      720 ALREGGKTIAVGIVTDILERK*--
CrHbs1      686 ALREGGRTLAVGVVTQLLE*----
CrSki7      710 ALREGGRTLAVGVVTQLLE*----
consensus   841 LRsgGrTiAvGiVtriieq
```



**Figure S2. Duplication of YSH/SYC1 in the *Saccharomyces* lineage was also followed by loss of alternative splicing.** **A.** RNA sequencing analysis identifies a novel intron in the 5' UTR of a single YSH1/SYC1 gene (SAKL0A08096) in *Lachancea kluyveri*. Expression of the annotated Ysh1-like protein is mediated by 3' splice sites at -90 and -72 relative to the AUG start codon. Expression of an alternative Syc1-like protein is mediated by a 3' splice site at +1592. **B.** Depiction of the YSH1 and SYC1 genes from *Saccharomyces cerevisiae* aligned with panel A. SYC1 is named because it is "Similar to Ysh1 C-terminal". **C.** rtPCR conformation of the *Lachancea kluyveri* alternative splicing. A primers to the shared first exon was combined with primers downstream of the 3' splice sites for rt-PCR. The rt-PCR products were directly sequenced. Arrow indicated the exon junction. **D.** Clustal Omega alignment that of the *Lachancea kluyveri* splice isoforms and *S. cerevisiae* proteins

**A. *Lachancea kluyveri* YSH1/SYC1 RNAseq**

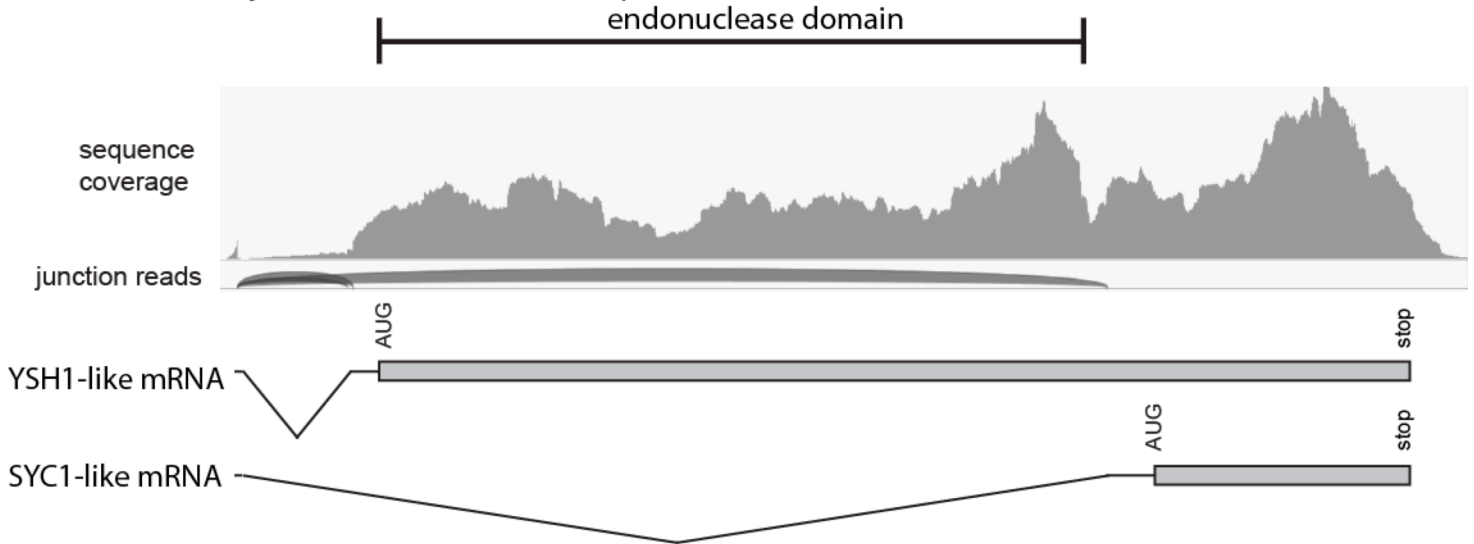

**B. *Saccharomyces cerevisiae* YSH1 and SYC1 genes**

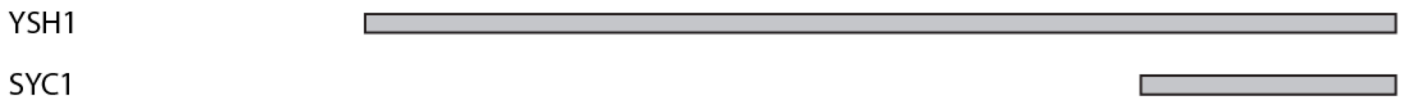

**C. *Lachancea kluyveri* rtPCR conformation**

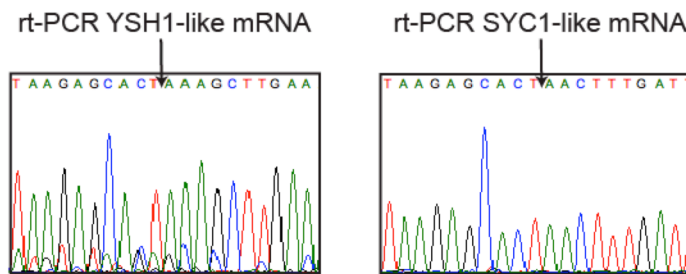

**D. Sequence alignment**

|           |     |                                                               |
|-----------|-----|---------------------------------------------------------------|
| LkYsh1    | 1   | MVQEQTSNTSFKFFSLGGSNEVGRSCHILQYKGKTVM LDAGVHPAHQGLASLPFYDEFDL |
| LkSyc1    | 1   | -----                                                         |
| ScYsh1    | 1   | --MERTNTTTFKFFSLGGSNEVGRSCHILQYKGKTVM LDAGIHPAYQGLASLPFYDEFDL |
| ScSyc1    | 1   | -----                                                         |
| consensus | 1   | e t tsfkffslggsnevgrschilqykgktvml dagv hpa qglaslpfydefdl    |
| LkYsh1    | 61  | ETIDVLLISHFHLDHAASLPYVMQRTNFQGRVFMTHPTKAIYRWLLSDFVKVTNIGSSST  |
| LkSyc1    | 1   | -----                                                         |
| ScYsh1    | 59  | SKVDILLISHFHLDHAASLPYVMQRTNFQGRVFMTHPTKAIYRWLLRDFVRVTSIGSSSS  |
| ScSyc1    | 1   | -----                                                         |
| consensus | 61  | idvllishfhldhaaslpymqrtnfqgrvfmthptkaiyrwll dfvkvt igsst      |
| LkYsh1    | 121 | ---SKDDNLYTDEDLAESFDRIETIDYHSTMDVNGIKFTAFHAGHVLGAAMFQVEIAGLR  |
| LkSyc1    | 1   | -----                                                         |
| ScYsh1    | 119 | SMGTKDEGLFSDEDLVDSFDKIETVDYHSTVDVNGIKFTAFHAGHVLGAAMFQIEIAGLR  |
| ScSyc1    | 1   | -----                                                         |
| consensus | 121 | skdd lytdedl esfdrietidyhstmdvngikftafhaghvlg aamfqveiaglr    |

LkYsh1 178 VLFTGDYSREMDRHLNSAEIPPLPSDVLVVESTFGTATHEPRVNREKKLTSLIHSTVSKG  
LkSyc1 1 -----  
ScYsh1 179 VLFTGDYSREVDRLNSAEVPPSSNVLIVESTFGTATHEPRLNREBKLTQLIHSTVMRG  
ScSyc1 1 -----  
consensus 181 vlftgdysremdrhlnsaeipp l s vlvvestfgtatheprvnrekklt lihstv kg

LkYsh1 238 GRVLLPVFALGRAQEIMLILDEYWSQHADDLGGGQVPVIFYASNLARRCMSVFQTYVNMNM  
LkSyc1 1 -----  
ScYsh1 239 GRVLLPVFALGRAQEIMLILDEYWSQHADDLGGGQVPVIFYASNLARRCMSVFQTYVNMNM  
ScSyc1 1 -----  
consensus 241 grvllpvfalgraqeimlildeywsqhaddlgggqvpvfyasnlarrcmsvfqtyvnmnm

LkYsh1 298 DDIRKKFRDSQTNPFIFKNISYLNKLNDEFQDFGSPVMLASPGMLQNGLSRDILLEKWCPEDE  
LkSyc1 1 -----  
ScYsh1 299 DDIRKKFRDSQTNPFIFKNISYLNKLNDEFQDFGSPVMLASPGMLQNGLSRDILLEKWCPEDE  
ScSyc1 1 -----  
consensus 301 ddirkkfrdsqtnpfifknisylnklndefqdfgspvmlaspgmlqnglsrdillekwcpe

LkYsh1 358 KNLVLITGYSVEGTMAKFLMLEPDTLPSINNPDLTIPRRCQVEEISFAAHVDFQENLDFI  
LkSyc1 1 -----  
ScYsh1 359 KNLVLITGYSIEGTMAKFIMLEPDTLPSINNPDLTIPRRCQVEEISFAAHVDFQENLEFI  
ScSyc1 1 -----  
consensus 361 knlvlitgysvegtmakflmlepdtlpsinnpdltiprrcqveeisfaahvdfqenldfi

LkYsh1 418 EKISAANIILVHGESNPMGRLKSALLSNFASLKGTENEVRVFNPRNCVVDLEFGKIGKIA  
LkSyc1 1 -----  
ScYsh1 419 EKISAPNIILVHGEANPMGRLKSALLSNFASLKGTENEVRVFNPRNCVVDLEFGKIGKIA  
ScSyc1 1 -----  
consensus 421 ekisa niilvhge npmgrlksallsnfaslkgtenevrvfnprncv vdlef gikia

LkYsh1 478 KAVGNIVDEASNILKT----EGEKVSEIKEETE EEEA-----GKCLKIDGETVVSIGIL  
LkSyc1 1 -----  
ScYsh1 479 KAVGNIVNEIYKEENVEIKEEIAAKIIEPIKEENEEDNLDLSQAEGGLVDEEEHKDIVVSIGIL  
ScSyc1 1 -----  
consensus 481 kavgniv e e kv ikee ee e vvsigil

LkYsh1 527 VSDEKNFDLNLVSLSDLREHHTDLSTTVLKERQTIHVDCCKELIYWHLCQMFGDIEVLLD  
LkSyc1 1 MSKSTNFDLNLVSLSDLREHHTDLSTTVLKERQTIHVDCCKELIYWHLCQMFGDIEVLLD  
ScYsh1 539 VSDDKNFELDFLSLSDLREHHPDLSTTILRERQSVRVNCKKELIYWHLCQMFGDIEVLLD  
ScSyc1 1 -----MDLPKDKSDRTHQ--RINLNNSGTDRTNDLYLHIVQTFGCIETTAT  
consensus 541 vsdeknfdlnlvslsdlrehhtdlsttvlkerqtihvdcckeliywhlcmfgdievll

LkYsh1 587 DEGVTLLNNLQDKNPKTSDVKSGELELRVMGDIKVSIVRDVATLEWTQGII-NDTVADSI  
LkSyc1 61 DEGVTLLNNLQDKNPKTSDVKSGELELRVMGDIKVSIVRDVATLEWTQGII-NDTVADSI  
ScYsh1 599 DDRVTNQEPKVKEESKDNLTNTGKLIILQIMGDIKLTIVNTLAVVEWTQDLM-NDTVADSI  
ScSyc1 45 EN-----ATKLLMLGDVEVEISASSVSI EWTKSMISQTIADSI  
consensus 601 degvtllnnlqdknpktsdvksgelelrvmgdikvsvrdrvatlEWTQgii ndTvADSI

LkYsh1 646 LAILLSIDSSPASVKLSSRSCNHDHDCG----DKLHDDVWKIKEISRLFTEQFGDCFTL  
LkSyc1 120 LAILLSIDSSPASVKLSSRSCNHDHDCG----DKLHDDVWKIKEISRLFTEQFGDCFTL  
ScYsh1 658 IAILMNVDSAPASVKLSSHSCDDHDHNNVQSNAGKIDEVERVKQISRLFKEQFGDCFTL  
ScSyc1 84 VIMIIGLC-----ASDKNVLSESELKERNHNVWKIQELQNLFREQFGDSFSI  
consensus 661 laillsidsspasvklssrscnhdhdcg s dklhddVwkikeisrLfTeQFGdcFtl

LkYsh1 702 LLDKNET--DHKEDIKGAITIGKSTARINFSNMSVEECNSNPLKGRIESLLGIGTDLVAP  
LkSyc1 176 LLDKNET--DHKEDIKGAITIGKSTARINFSNMSVEECNSNPLKGRIESLLGIGTDLVAP  
ScYsh1 718 FLNKDEYASNKEETITGVVTIGKSTAKIDFNMKILECNSNPLKGRVESLLNIGNLVTP  
ScSyc1 131 D----EGIGKKNVKNKSVTIGKSKATIDFSTMKILDCNSNPLKGRVESILSIGQLTTP  
consensus 721 lldknEt dh edikGaiTIGKStArI FsnM veeCNSNPLKGRiESllGIGtdLv P

LkYsh1 760 LC\*  
LkSyc1 234 LC\*  
ScYsh1 778 LC\*  
ScSyc1 187 LC\*  
consensus 781 LC

Figure S3. Sequence alignment of Hbs1 from diverse eukaryotes.

```

Amphimedon      1  MARHRNVRR-----L---DFDEE-RDF
Nematostella    1  MSRHRNIRN-----Y---AYEDD-MSE
Danio            1  MSRHRNVRG-----Y---NYDED-FED
Xenopus         1  MARHRNVRG-----Y---NYDDD-FDD
Sarcophilus     1  MARHRNVRG-----Y---NYDED-FED
Homo            1  MARHRNVRG-----Y---NYDED-FED
Anopheles      1  MSRHRNVRN-----A---VYD-DYDDD
Coboldia        1  MSRHRNVRS-----M---NYSDEYDGY
Drosophila      1  MSRHRIVRT-----M---DYNDEYDGY
Caenorhabditis  1  MSRHRAIRN-----L---NLEDEM---
Trichuris       1  MSRHRNVKT-----I---DIEEQE-D
Crassostera     1  MSRHRNVRT-----M---NFEDEYFDE
Capsaspora      1  MSRHRNLRH-----L---DYSDDYDVD
Batrachochytriu 1  MSRHRNIRN-----M---DLNDFYDD-
Spizellomyces   1  MSRHRNIRN-----I---NLDELDE-
Lichtheimia     1  MSRHRAVRN-----L---DIDVLEDE-
Rhizopus        1  MSRHRAVRN-----L---DVDGILEE-
Ustilago        1  MSRHRAVRN-----L---DLDEELAE-
Cryptococcus    1  MSRHRFVRN-----I---DLNDELDD-
Schizosaccharom 1  MSRHRDVKN-----L---DLDDYELD-
Saitoella       1  MSRHRDVRN-----L---DLDEEM---
Saccharomyces   1  ---MAYSDY-----S---DGADMPDF
Lachancea       1  MAKYYDEDD-----M---DYHSDVPEF
Neurospora      1  MARHQNIRN-----L---DYAELEE-
Fusarium        1  MSRHRIVHT-----F---DTNDIVSE-
Aspergillus     1  MSRLRV--KN-----VS-
Dictyostelium   1  MSRHRFLKN-----M---DGDDFEDF-
Arabidopsis     1  MPRKG---L-----S---NFDDYDGF
Oryza           1  MPRKV--V-----S---GPDYDDEY
Pinus           1  MPRKI--K-----HHDYEDVY
Physcomitrella  1  MPRKW--R-----Q---SDFDDDG
Chlamydomonas   1  MTKGKRGAF-----Y---DDDDLDDGY
Phytophthora    1  MSRHRNVRN-----R---AYSYDEDEDY
Tetrahymena     1  MSRNTKMKQ-----I---AAEGIDDH-
Giardia         1  MPRYI-------SHNNYSDYSDDG
Leishmania      1  MNRHNKFYAE-----VAGEL---EGDDY-YGD
Trichomonas     1  MSKKASRKLlyDADDFDDEDEVPPrKRLPARSQTvADLKSASSMynYQNNNDdYSdVY
consensus       1  msrhr vr                      1      dde dd

```

```

Amphimedon      19  GDIYGRS-----FED-EVAISPATASQFMYPHGNTGIA-L-SSYMKPH-----PLE
Nematostella    19  -DVYGHS-----VEDYDMAVSPPTAHQFMYSRGNHDP-LFSNYMGGFRFGS--VEEKEE
Danio            19  DMYGQS-----VED-YCISPATAAQFIYSRQDSRQA-RHVET-----VEEAIE
Xenopus         19  DDLYGQS-----VED-DYCISPATAAQFIYKRDR-Q-T-SFTEP-----LEEEEG
Sarcophilus     19  DDLYGQS-----VED-DYCISPATAAQFIYSRDKP-S-SFVEP-----VEEYDYE
Homo            19  DDLYGQS-----VED-DYCISPATAAQFIYSRRDKP-S--VEP-----VEEYDYE
Anopheles      19  DYQYGQS-----VE--DDCISPTDASQWIYDRAKQQS--MSEFLANNRDI--EEEDDDE
Coboldia        20  DDVYGHS-----VDD-DISISPTDAQQWIYDRARGQQS--MSAFIANNRDI--AAAEGD
Drosophila      20  DDIYGHS-----VED-EHCISPTDAQQWLYDRARGQQS--ISAFISKNKDI--QEEBADE
Caenorhabditis  17  DDDYDDD-----YDDYEDEE--NPEKQYTYDRNSLSTN--YYTYLTDs-----
Trichuris       19  YSDYGNs-----VED-NFCLSPSTA-QFIYQRDPNRSGL--EF-GDHLTIPIAKESTHE
Crassostera     20  DEVYGHs-----YDD-SYCVSPATAAQFTFNRRERDV--NLSSYMEEGI-----PEE
Capsaspora      20  DQDYDEDDD---YGDdRYAGRT---G-----GASFGAYFDTSNAT-----N
Batrachochytriu 19  ---EDDY---YEDDDAEa-IDDDQN-----DTDSECHVAYDPSAHKA-----
Spizellomyces   19  --DYDDD---YDEELYDGDYTYEAQG-----GHTVASFI--DTEQKPV-----
Lichtheimia     19  --DTYSDDY---DENELEdGDLNDEDdRQ-----ELE-----
Rhizopus        19  --DYQSE---SENDfDESELtNEDLD-----LLD-----
Ustilago        19  ---DDY---YDEDpYDNLSp-EDHD-----AMM-----
Cryptococcus    19  -----GDE---EV---GMSA-EETA-----QMN-----
Schizosaccharom 19  -----EE---PGEELTEEQEE-----EFR-----
Saitoella       17  ---YDDDY---YDGDGHdM--TYEEQE-----QME-----
Saccharomyces   17  HDEGEFDdY---LNDEYdLMN---EVFPtLKA-----
Lachancea       20  QDESEFDdY---LNDEYGLMN---DMFPPrAKK-----
Neurospora      19  ---Y---GA---FSDEEEELSp-EDQV-----RMR-----
Fusarium        19  ---FDGDD---YEEEGEdELSp-EDRQ-----AMD-----
Aspergillus     11  ---YDEDD---YD-DGYdSPDP-EEQE-----ILE-----
Dictyostelium   19  ---KEEDDLGEYdDEVYdVY-----
Arabidopsis     17  DDDD---DA---FyD-YDvDID-----EHEE-----
Oryza           16  NDDY---DE---YDED-YDDYGG-----TGHS-----DDIQH--P-----
Pinus           15  DdSYDYDEE---YDyD-YDdNEE-----SAEC-----HDL-----
Physcomitrella  15  YDDYDEEDY---YEEEYLEDKEPTSTS-----SVVPQGS-----QSFTS--T-----
Chlamydomonas   20  DDDYD---DdYEEEPAPAPK---AELAKPQA---GGKQPA--Q-----
Phytophthora    20  DEY-----YDD---YEPtSPNSNEFMYRRdSPSRQrSVfSF---GQEDTE
Tetrahymena     19  ---YHSEDD---EQFNs-----EDEE-----
Giardia         18  YDDYD-----DYdCGRLKKSgG-----A-----
Leishmania      24  DDDYNYDEE---YEE---EGEYEEAA-YEATASAPPE-PAHMSESTAQ-----
Trichomonas     61  DEPYGYDGE---EDFNdYdDDSAK-----
consensus       61  d y d      edd ye

```

|                 |     |                                                               |
|-----------------|-----|---------------------------------------------------------------|
| Amphimedon      | 62  | TQSEK-----LPSS-----AGAS---G-----                              |
| Nematostella    | 70  | EEEE-----NSLTSSQDYKRPQLDALSEAKLSSCLD-QLNSI-LGDD---C-HEPTAV    |
| Danio           | 63  | EEEE-----MPTSPMTSTLDSLQGRLYSCLD-QMRTV-LGDS---I-PDSTLT         |
| Xenopus         | 61  | E-YEE-----LDKTKATDSSLSAVDQARLYSCLD-HMREV-LGES---V-MEQVMI      |
| Sarcophilus     | 62  | D-TKE-----PTNSISNHQLSGIDQARLYSCLD-HMREV-LGDD---V-PDQTM        |
| Homo            | 60  | D-LKE-----SSNSVSNHQLSGFDQARLYSCLD-HMREV-LGDA---V-PDEILI       |
| Anopheles       | 68  | LAAETGREGPAHKRRDSECFQMPPELNDEDRARLMSCMD-EIRDV-LGET---C-SDRQMV |
| Coboldia        | 70  | DDDD-----LGKPRRSDNFQMPPTLSKENQVLLDSCMD-AIRDV-VGDA---F-SEKKIV  |
| Drosophila      | 70  | DEDE--DAFAKARRDSESFQMPQLDEIEQAKLSSCVD-EVRSV-VGDA---V-SERRIV   |
| Caenorhabditis  | 56  | -----GRNSPALPAPHPAPPTS-----LS                                 |
| Trichuris       | 68  | -----DYDLPED-----ETVTC-----SPIVVM                             |
| Crassostera     | 63  | EDES-----PEPLSDSGRDNLKLDDVEQAKLNSCKE-EIVNV-IGDT---I-PEHIVS    |
| Capsaspora      | 55  | A-----TADDLPDLSTLTLEKEDLLREARA-KIEPV-VGNT---V-TNAEIV          |
| Batrachochytriu | 55  | -----SVNANIQKEIS-IVSQF-VGPSYS---EAYIK                         |
| Spizellomyces   | 57  | -----TETRGAINLVE-EVRNI-VGDDFP---TEQIS                         |
| Lichtheimia     | 45  | -----NGLS-HVRNI-VGEDIGIS--DTEIK                               |
| Rhizopus        | 44  | -----EGLE-YIESV-IGENNGIL-SSRQIK                               |
| Ustilago        | 40  | -----EAYAQTLEVI-GPTVSNFG-TEREIK                               |
| Cryptococcus    | 35  | -----RAVS-VARNL-LKDVTPI-SDNEIA                                |
| Schizosaccharom | 36  | -----SAVATVRETL-LGV---PI-SEKEIA                               |
| Saitoella       | 40  | -----AGVA-AVHDA-LNGV-PGI-TLKEIR                               |
| Saccharomyces   | 44  | -----QLQD-----YQGW-DNLSLK                                     |
| Lachancea       | 47  | -----EMAD-----YQGW-NNLAVK                                     |
| Neurospora      | 40  | -----EGTAQVLEALGVEA--HKV-PKTQIE                               |
| Fusarium        | 42  | -----QGTAEVRAALGTEA--NKV-TTQIE                                |
| Aspergillus     | 33  | -----QCTAEVLAQLLSEGPSVTA-TRDEVQ                               |
| Dictyostelium   | 36  | -----DV-VVEKFPDI-TYPEIE                                       |
| Arabidopsis     | 37  | -----EAAAEF-----K-EEIAKT                                      |
| Oryza           | 42  | -----TKEKES-----K-KSSSMV                                      |
| Pinus           | 41  | -----SK-----V-ENLNRQ                                          |
| Physcomitrella  | 53  | -----TQPTATE-----V-NEPETE                                     |
| Chlamydomonas   | 54  | -----TAPKAAP-----S-AAPARA                                     |
| Phytophthora    | 60  | K-----ETQEPTNDPGDVEILEAMIP-QVQQA-VGSR---F-SAHQIT              |
| Tetrahymena     | 34  | -----IIEDI-IFHYKNQF-TKREV                                     |
| Giardia         | 36  | -----V-----EG                                                 |
| Leishmania      | 65  | -----ATASAAPAV---RVNPTYTTIS---PQ-VDDDYELLDMLLPQL              |
| Trichomonas     | 82  | -----IDEL-----I---AKL                                         |
| consensus       | 121 | 1 i l i l                                                     |

|                 |     |                                                       |
|-----------------|-----|-------------------------------------------------------|
| Amphimedon      | 76  | -----APTQPN-----                                      |
| Nematostella    | 118 | DAILKHD-----FNVEKALDYIFNRETKQDKSCESNKG---TG--         |
| Danio           | 108 | QAALKYD-----CDPHRALDFILSENTNTQAPSARTNP---QL--         |
| Xenopus         | 105 | DAVLKCYD-----FDVAKALDLVFKQDCNKNIPAN-----              |
| Sarcophilus     | 105 | EAVLQSK-----FDVEKALAMVLEQDKKQT---KSE-----             |
| Homo            | 103 | EAVLKNK-----FDVQKALSGVLEQDRVQSLKDKNE-----             |
| Anopheles       | 122 | EAIMKHD-----YECSKALDEILNSNKTPPAALGAKSGSKLTA--         |
| Coboldia        | 119 | ETIIKFD-----YDFTKSLDAILNPEKVDPPQGLKVT-LPPAT--         |
| Drosophila      | 122 | ETSMKFD-----YDMQKILDEILNEETNKSAPAVNK--M-----          |
| Caenorhabditis  | 75  | STIVR-----NMTAPLLHQKPPKNLNSRPS-----                   |
| Trichuris       | 87  | QSVTRPT-----SKLVSGNFYDPRSPKAEPLQR-----                |
| Crassostera     | 111 | QAVVKHQ-----YNIQAALNELLNQSEAPKQRPQRPDRRANR--          |
| Capsaspora      | 96  | DAILHYN-----FDVEKAIWVLELEGYDPEDEDADNDQDDVVLAKRK       |
| Batrachochytriu | 82  | TILASNG-----NNPEQSYNYILNHQK-----                      |
| Spizellomyces   | 84  | DVLQDSG-----NDIERAVNLLYDQGPRIAPPGFV-----              |
| Lichtheimia     | 67  | EALWYYY-----FDREETVNWVFDKVAKIKAEEEKQ-----             |
| Rhizopus        | 67  | EALWYYY-----LNKETLEWALDEISAKALEEK-----                |
| Ustilago        | 64  | DVLWDAY-----FDVDSAVTQLVEEKSRREAKAEKDRQKQ-----         |
| Cryptococcus    | 58  | DSVWHYW-----FDGEKAAAWLRQDREKKAAKAKAAQ-----            |
| Schizosaccharom | 57  | DTVWYYY-----FDVEKSVNYLLQKASSKAGAKEKQNTDSQKEKK         |
| Saitoella       | 62  | ETLYYYY-----FDLEKSIWVLELQHSVKKPAKPKA-----             |
| Saccharomyces   | 58  | LALFDNN-----FDLESTLAEKTKLKKKTKPKPIA-----AAN           |
| Lachancea       | 61  | LAIQDQN-----FDFNQAMIELKRIYRKKQFAQPKQE-----AKK         |
| Neurospora      | 63  | ESLWYYY-----WDVDKTIITYLISKYIDPPKPAKTA-----            |
| Fusarium        | 65  | EALWYYY-----YDVKSVTYLIKTFIAPAPKPAKKT-----             |
| Aspergillus     | 58  | EALWYYY-----NDVEKSVNYLRGKTKEMKKQNP-----               |
| Dictyostelium   | 52  | KVLMDFD-----YNVDDAIDFILLNGGLNKGKKNK-----              |
| Arabidopsis     | 50  | QGLWRCAICTYDN-----VETMFVCDICGVLRHFPVAGN---QSINKN----- |
| Oryza           | 56  | PVLWRCSMCMFDN-----HESMVYCEMCGVFRESFMKSAKDGSIKVHG----- |
| Pinus           | 50  | ADVWHCSICTYKN-----PENRSACDMCGVIRNASLEGQCTAAATIKD----- |
| Physcomitrella  | 67  | EGLWACPVCTFDN-----SLDSLTCIDTDPREDLSEKVS DPSTSSKE----- |
| Chlamydomonas   | 68  | AA-----KPDPAVKSLH-----                                |
| Phytophthora    | 97  | QELRSAN-----YDLDKTVVALLERGKAPAAAGGVLP-----            |
| Tetrahymena     | 53  | RLLDKHN-----WVEDDVEDDLDLKKKREKQKQKQK-----TEEKK        |
| Giardia         | 39  | RPAWQS-----                                           |
| Leishmania      | 100 | HALWKASAPTMLPLSEGEAVTALRASDYDVEPAFLQLEKREDEERS-----   |
| Trichomonas     | 90  | KKTYDISKDMDEI-----FLAFRNLDYDYSVSVRNLEKGDYG-KAIKK----- |
| consensus       | 181 | d i k fdve l i l                                      |

|                 |     |                                                              |
|-----------------|-----|--------------------------------------------------------------|
| Amphimedon      | 82  | Q---PSQPALPSQYLRSEPSI---KKPKD-----AT-----A-PV-----ETVTI      |
| Nematostella    | 153 | H---PLSVHPPQPSLLSAPAK---IKPTP-----APIFVGLPKA-KAESVVASAVAAN   |
| Danio           | 143 | E---PNTTAAPQKAKV-----REAPES-RVESEVVPKVARM                    |
| Xenopus         | 135 | Q---ELISGKPTKGLA-----RGLQAP-EHEHEIVPKMAKM                    |
| Sarcophilus     | 133 | E---AISMGKATKGKS-----VDHQSS-RSESEIVPKVTKM                    |
| Homo            | 134 | A---TVSTGKIAGKGP-----VDSQTS-RSESEIVPKVAKM                    |
| Anopheles       | 160 | G---AAMEKGI GERLLERSEKKLQAAGR N-----VPIIVATPSA-DVRPSNDAASTVI |
| Coboldia        | 156 | T---VTSDKGEANKLK-----EKPPA-PLVQKEKPVITIV                     |
| Drosophila      | 155 | -----KAPAA-PVLPKTVSKTVPT                                     |
| Caenorhabditis  | 102 | -----TPQ-TSSNL-----NTPK                                      |
| Trichuris       | 115 | -----P-MSQNL-----NANN-----QRETIEL                            |
| Crassostera     | 149 | Q---EFAPVQPTVQLK-TPVK---KNTT-----SDLAQATSATSQIKLETSNQ        |
| Capsaspora      | 136 | QAFGSSATQPTAKSGSANSAAAGKAAGKNVSTASKANSKSTPAAASPA-----KG      |
| Batrachochytriu | 104 | -----PEPSASSVITNK-----PTFTFNKPSRDDIV-----KQ                  |
| Spizellomyces   | 116 | -----APPPGFALKSDSRQPASRIADDV-----APFAFDAPSRDDVV-----NQ       |
| Lichtheimia     | 98  | -----KKKAAKKAAA--AAAS-----KGPTATQSK-----                     |
| Rhizopus        | 98  | -----KLKEKAKKEKKEVKS N-----NNPAAKSAV-----                    |
| Ustilago        | 99  | -----AAKAAAANA-----SAPASGTSTPLHRKAAVSO                       |
| Cryptococcus    | 90  | -----TAKSASLP-----GKPRVQQVANQKSKLAVSQ                        |
| Schizosaccharom | 97  | Q-----NKSK-EALADA-----K-DPLDESSNGIKNLSLNK                    |
| Saitoella       | 94  | -----AP-T-----ASK-ASAPE-----VAKVFSGSPRDDVV-----IA            |
| Saccharomyces   | 93  | G-----S-A-----N                                              |
| Lachancea       | 96  | Q-----AIS-----NFNKPSRDDVVLTAQKKAFTD                          |
| Neurospora      | 95  | -----PPKT-----APKQDVATAGKK-----                              |
| Fusarium        | 97  | -----PEAG-----KQPA--PKAAK-----                               |
| Aspergillus     | 90  | -----PPVAAKG-----KGPSRDDVVLNAQS-----                         |
| Dictyostelium   | 84  | -----KPPQAVNIINNNNNNKSEPVNT-----NKSTSKDVTNSLKTLSIGG          |
| Arabidopsis     | 90  | APF-----KFDAPSRDDLVNGLTSSKTG                                 |
| Oryza           | 99  | IPS-----DFGTSPMPKSDSTKMPV----                                |
| Pinus           | 93  | MPKSDLSEGQ-----IKIWRLCCTYDNPEHIS--VCGIC--RTA                 |
| Physcomitrella  | 110 | KAYVVTEVQR-----VSPLAKALFNPLPGT-----K--                       |
| Chlamydomonas   | 80  | QPTYPVAP-----AATSSSPFQFDTPSRDDAVKAAQER-KPG                   |
| Phytophthora    | 130 | Q---IQIPLDAVALA-----IGNEEKQELPKPKKEIV                        |
| Tetrahymena     | 89  | Q-----PTGGNVLV---KKQQNQ                                      |
| Giardia         | 45  | -----                                                        |
| Leishmania      | 146 | -----                                                        |
| Trichomonas     | 133 | -----                                                        |
| consensus       | 241 | p                                                            |

|                 |     |                                                             |
|-----------------|-----|-------------------------------------------------------------|
| Amphimedon      | 115 | K-----QS---Q-----                                           |
| Nematostella    | 199 | K-----VS-----                                               |
| Danio           | 175 | T-----VS---G-----                                           |
| Xenopus         | 167 | I-----VT---G-----                                           |
| Sarcophilus     | 165 | T-----VS---G-----                                           |
| Homo            | 166 | T-----VS---G-----                                           |
| Anopheles       | 209 | I-----TPSASV-----                                           |
| Coboldia        | 187 | S-----AATSDK-----                                           |
| Drosophila      | 173 | P-----PPKISL-----                                           |
| Caenorhabditis  | 114 | -----                                                       |
| Trichuris       | 133 | T-----DS-ASC-----                                           |
| Crassostera     | 190 | T-----VKSANN-----                                           |
| Capsaspora      | 188 | -----GS-----GSGSAG-----                                     |
| Batrachochytriu | 132 | A-----RS-----KKS VKV-----                                   |
| Spizellomyces   | 155 | A-----RS-----KIGPSG-----                                    |
| Lichtheimia     | 121 | -----KT-----                                                |
| Rhizopus        | 123 | -----KPAA-----                                              |
| Ustilago        | 128 | A-----A-----                                                |
| Cryptococcus    | 117 | P-----NS-----PSTSAS-----                                    |
| Schizosaccharom | 126 | N-----                                                      |
| Saitoella       | 122 | A-----RE-----EGPKSG-----                                    |
| Saccharomyces   | 97  | -----VTQ-----                                               |
| Lachancea       | 121 | V-----E-----KVAN-----                                       |
| Neurospora      | 111 | -----SAN-----                                               |
| Fusarium        | 111 | -----                                                       |
| Aspergillus     | 111 | -----SAKG-----                                              |
| Dictyostelium   | 126 | N-----N-----NN-----                                         |
| Arabidopsis     | 114 | PKGS-----GDASMRQKE-----KQDSV--EQKPLKK-GGDSS---ETS--SR       |
| Oryza           | 119 | -----NTRRTDF-GGDPE---IKN--AS                                |
| Pinus           | 129 | RKASFEQSQETASETTDMPKAD-----RSDGKSKIWRCLSCTYDNPE---HVS--AC   |
| Physcomitrella  | 136 | -----SDQATASLRSNMPVLYQKSWGKVADSSSFSSKIVPFKFDTPSPD---EKNLAAR |
| Chlamydomonas   | 116 | A--VAPPAAAAAPTAPSLPQNK--NFL--RSPM---LQQKQQQGGPANGEGADEAAR   |
| Phytophthora    | 159 | M-----PAPARG-----                                           |
| Tetrahymena     | 104 | N-----Q-----QGKSNN-----                                     |
| Giardia         | 45  | -----                                                       |
| Leishmania      | 146 | -----KRG-----G                                              |
| Trichomonas     | 133 | -----                                                       |
| consensus       | 301 |                                                             |

|                 |     |                                                     |
|-----------------|-----|-----------------------------------------------------|
| Amphimedon      | 119 | -----SNTKM-----GFITHH-----RSN                       |
| Nematostella    | 202 | -----SNVVL-----GFTTSR-----                          |
| Danio           | 179 | -----KKQTM-----GFDVRS-----A--                       |
| Xenopus         | 171 | -----KKQTM-----GFDVPS-----AAS                       |
| Sarcophilus     | 169 | -----KKQTM-----GFEIPG-----VTA                       |
| Homo            | 170 | -----KKQTM-----GFEVPG-----VSS                       |
| Anopheles       | 216 | -----AKKTL-----AFEVTSSPRMQ-----                     |
| Coboldia        | 194 | -----GIKK-----GFEIAS-PLIQ-----                      |
| Drosophila      | 180 | -----KEPRR-----GFEIPSPKVFS-----                     |
| Caenorhabditis  | 114 | -----                                               |
| Trichuris       | 139 | -----AEERL-----ADV-----                             |
| Crassostera     | 197 | -----SETVF-----GTEKNTVKDLR--TKAG                    |
| Capsaspora      | 196 | -----KGTAASASKPGATNLKPLV--MPSSQPKQQPQPTDTHREP       |
| Batrachochytriu | 141 | -----DKLSTADSGSTSDDVNVVSDMEALGFQV--KTPL--APQM       |
| Spizellomyces   | 164 | -----KSAKLPSSKFTP-----QIRKK--QEPI--PEPM             |
| Lichtheimia     | 123 | -----KSTEP-----SSASNQS--EDQL--SQ--                  |
| Rhizopus        | 127 | -----KPATKPTAKPTVKK-----STGDEVEFLSD--EEL--DR--      |
| Ustilago        | 130 | -----KAAGGKPVGTVSQ-----                             |
| Cryptococcus    | 126 | -----KST-----SKSGSASTPRTLKGSN-----                  |
| Schizosaccharom | 127 | -----DE-----PA-----                                 |
| Saitoella       | 131 | -----KKAKTA-----KK--DQAI--AAPT                      |
| Saccharomyces   | 100 | -----KLANI-----SISQORPNDR-----                      |
| Lachancea       | 127 | -----EVSKL-----SVNG-----G-----                      |
| Neurospora      | 114 | -----VHNKK-----GSS-----SA                           |
| Fusarium        | 111 | -----PQKE-----KVK-----DA                            |
| Aspergillus     | 115 | -----FKSQPASKSAGDKK-----NQ                          |
| Dictyostelium   | 130 | -----KVP-----VESKTPYNTFIGTPIND-----KNLPHSPK-----    |
| Arabidopsis     | 149 | -----GRHDKLDD-----KGGAG-----I-----                  |
| Oryza           | 136 | -----ISHEKVGSTQYASVSSSG-----                        |
| Pinus           | 176 | GMCS-TIRSASLEESQASASGTAAMSNPASTTKA-----SLDITA--KVEA |
| Physcomitrella  | 187 | GLKKSPIRVAQSPDDI--LINGARSSMAKAGTSK-----SISS--AVSK   |
| Chlamydomonas   | 166 | GVA-----ALGLTSAASGGSEGGTTPGGGTRQH-----HPLGH--P---   |
| Phytophthora    | 166 | -----KALAI-----GALPSTPKEE-----                      |
| Tetrahymena     | 112 | -----DQA-----                                       |
| Giardia         | 45  | -----KSSSTGSTPSNTGSTT--CSTPKTTFETVSTPTPI-----       |
| Leishmania      | 150 | GVLK-----VT--AAAGPANRASTFPA-----VKSPEPGG-----       |
| Trichomonas     | 133 | -----KSQK-----HIQIPA-----                           |
| consensus       | 361 |                                                     |

|                 |     |                                                             |
|-----------------|-----|-------------------------------------------------------------|
| Amphimedon      | 133 | ----IDSSPARSPSPS-----VLPGRS-----TP--                        |
| Nematostella    | 213 | -----E--EKRSSATSSPD-----QQ--                                |
| Danio           | 191 | EENGGVAPSLRRGSPPEATAV---PTT-----ETPS-K-----QS--             |
| Xenopus         | 185 | EINGQIVKGQTTDEAMEET-----D--NGQESANPVPS-----FQ--             |
| Sarcophilus     | 183 | EENGDSVHTPHKGPPEASDASI---VSSGILE--TVSKSTLPSHT-----IQ--      |
| Homo            | 184 | EENGHSFHTPQKGPPIEDA-I---ASSDVLE--TASKSANPHT-----IQ--        |
| Anopheles       | 232 | -----SPSVS-----GR--NTPFIT-----E--                           |
| Coboldia        | 209 | -----SPALS-----GR--NTPESS-----E--                           |
| Drosophila      | 196 | -----SPVVS-----GR--NTPVDI-----S--                           |
| Caenorhabditis  | 114 | -----RTPQVKNL-----QAESTPTVSRP-----SS--                      |
| Trichuris       | 148 | -----KGMREGEM-----NSEEGS-----LQ--                           |
| Crassostera     | 217 | NLNANNEVDVTDASAVLNDKSLQAVNSEIDLVDLVRDLDTPSKS-----SS--       |
| Capsaspora      | 236 | SLATKDVVAMGFSPAVSANASLV---SS-AT---ASPLSLSPSLASSGDKSKGLPSSKG |
| Batrachochytriu | 179 | GARNKALLTSTETPVIPGKSVPP---SK-MVR-VQS-----SDNGP--            |
| Spizellomyces   | 189 | DQLQMDLSGLNLAPPKATLAPP---PA-MAR-TVSASSNSLAPP-----           |
| Lichtheimia     | 141 | -----DMLMGLEDVAKKAA-----QA-RLK-VSSA-TSTPAGTTP--             |
| Rhizopus        | 158 | -----DMNAMGLS-----E-----                                    |
| Ustilago        | 144 | --LRNEIESLEIHGSSSKA-----A-S-----                            |
| Cryptococcus    | 146 | --LSTDLEGLHLNEEMDEAE-----R-E-----                           |
| Schizosaccharom | 131 | -FQTNGEVKMKNS-----SESDNQP-----                              |
| Saitoella       | 147 | NQLEVDMQAMNMGSSATGGA-----PAPAPP-----                        |
| Saccharomyces   | 115 | --LPDWLDEEE--SEGERN-----G--EEAN-----                        |
| Lachancea       | 137 | --SDQDID-IE-SEESDD-----D--RKPK-----                         |
| Neurospora      | 124 | DGVTNQVSQLK-----                                            |
| Fusarium        | 120 | SEAEKDVAGLK-----                                            |
| Aspergillus     | 132 | GDLAGGMNLS-----                                             |
| Dictyostelium   | 158 | ESLIDSINATT-----                                            |
| Arabidopsis     | 164 | -----KSGKSLPKA-----KADMSNETSSSSKYM---ETS----ESLTGT--        |
| Oryza           | 155 | -----AGKKL-----KEDQSSRATSSAQNE---DVA----QKSSD--             |
| Pinus           | 220 | EIVEDNAKSSKEPAPSSLSKA-----DKHEKRENGVLREDKSSSN----GLVSEE--   |
| Physcomitrella  | 226 | ----LNVPLGSQSSGAST-----SESHVGNSSSAPE----GELADA--            |
| Chlamydomonas   | 201 | -----EAPNAL-----SHP-----GGLHGL--                            |
| Phytophthora    | 181 | -----KKPRISAAD-----AASAAPTISRA-----QT--                     |
| Tetrahymena     | 115 | -----AQLTRQASSVTAA-----STSGATTAPSDKSK---AGEY-I---           |
| Giardia         | 78  | -----TPSTLS-----                                            |
| Leishmania      | 178 | -----EEASD-----NEGNSASPSASS-----                            |
| Trichomonas     | 143 | -----SQTPSKLIP-----PKG                                      |
| consensus       | 421 |                                                             |







Amphimedon 360 LK-QGGYKEGDITYVPCSGMTGDNLT--STL-----TDSWY-K-GPSLAQSIDRFRPP--  
Nematostella 434 LK-QVGFKSDVYVVPVSGLSGENLV--KPCTE-EKLLKWKY-Q-GQCLVDRIDEFKSP--  
Danio 427 LK-QAGFKSDVYVVPVSGLSGENLT--TKSKV-ADLTAWY-T-GPCLVEQIDAFKPP--  
Xenopus 423 LK-QAGFKESDVYIPTSGLSGENLV--KRSQI-SELVWGY-K-GPCLLEQIDSFKAP--  
Sarcophilus 429 LK-QAGFKESDVAFIPTSGLSGENLI--TKSQS-SELTKWY-K-GQCLLEQIDSFKPP--  
Homo 429 LK-QAGFKESDVGFIPPTSGLSGENLI--TRSQS-SELTKWY-K-GLCLLEQIDSFKPP--  
Anopheles 450 LK-QAGFRDADVTYVPCSGLTGENLV--KDPD-PALTAWY-S-GPTLLKVIDSFKTP--  
Coboldia 420 LK-QAGFKSDVYVPCSGLTGENLV--KPATD-PILLSWY-K-GPTLLAVIDSFTVP--  
Drosophila 416 LK-LAGFKSDSVFTPCSGLTGENLT--KKAQE-PALTNWY-S-GRHLLDVLENFKIP--  
Caenorhabditis 339 LTRQAGFS--KPKFVVPVSGFTGENLI--KRME-----LDWY-D-GPCLLELIDSFVAP--  
Trichuris 371 LK-QVGFGA-KCLFVPCSGLTGENLK--TVPDDSCPLTRWY-S-GPTLVQALDSMEPI--  
Crassostera 465 LK-QAGYKIDLSYIPCSGLGGENLT--KAVSE-PKLASWY-K-GSTLVEQIDKFKAV--  
Capsaspora 507 LK-TSGYRLDNVTFVVPVSGLIENLI--ERK-E-PKLTQWY-S-GPTLVEQIDQFQPP--  
Batrachochytriu 418 LV-QVGFKKQRIVFIPCSGLSGENLK--ERQ-V-DGLCRWY-S-GPTLIEALDALEAP--  
Spizellomyces 435 LS-QVGFRRKQVAFIPTSGLSGENLV--KRE-S-DKLNAWY-S-GSTLVEQIDAFAP--  
Lichtheimia 375 LV-QAGYRKSNTLYIPTSGLTGENLI--KKS-----LVNWS-S-GPSLLELIDAFEP--  
Rhizopus 366 LL-QIGFKKSNLFFVPIPSGLTGENLV--EKSAI-PELTSWYQA-GPSLIEQIDQLEPP--  
Ustilago 367 LM-SCGFDAAKLRFVPCSGSNGENLA--VRERG-GALSAWY-S-GPTLVELLDELEPP--  
Cryptococcus 368 LL-SAGFNSTKTFPLPLAMEGINIL--D-NDQ-PELKKWY-S-GPALIDALDDVEVP--  
Schizosaccharom 346 LKIMVGFKTSNVHFPVPLSAGENLNI--QKD-S-SDLYKWY-K-GPTLLSALDQVFP--  
Saitoella 363 LT-NAGFDQPQVQYIPCSGLTGENLV--KRSAB-P-ALTWF-N-GPTVLGALSIAPT--  
Saccharomyces 336 LV-DIGFFEDNINWVPIPSGLSGENLV--KIEYT-DEVQWY-N-GPNLMSTLENAAPKIS  
Lachanea 357 FK-DIGIKKEQVSWVTCSGLSGEGVY--NIKRP-LG-IDWY-N-DPSLVDCLEDAVAKLN  
Neurospora 327 LT-ATGFQPKNIATFVVPVSGLSGENLV--RKS TD-P-AASWY-T-GKTLVEELEASPS--  
Fusarium 323 LA-GLGFVSKNIDFVPIPSGLNGDNLA--RRTED-P-AASWY-T-GPTLIEALENSEPT--  
Aspergillus 335 LT-TAGFQAKNIATFVPCSGFRGDNVT--RRSD-P-NASWY-T-GRTLVEELEATEPY--  
Dictyostelium 369 LV-HAKFNEKNIRFIPISGFTGENLI--DRQ-E-SKLLKWKYDSKQPTLIECIDSFVSG--  
Arabidopsis 410 LQ-SCRFKSSLTWIPLSAMENQNLV--AAPSD-NRLSSWYQ--GCLLDVADSVKFP--  
Oryza 396 LR-ACNFKDSSVTWIPLSAVENQNLV--KIPSD-VRLTSWYQ--GFCLLDAIDSLQLP--  
Pinus 482 LR-RCGFKESLMWIPMSVIENQNLV--TSTSD-GRMSWY-T--GPHFLESIDLKFP--  
Physcomitrella 482 LK-QCGFKDGSIQVVPVASEGQNLV--MASTE-SALKAWY--GCLIELVDSLKPP--  
Chlamydomonas 436 LK-SVGFKESGLQWLPAAAGLGENLV--GPPQD-PALKAWGPGRPVTDADAFKPR--  
Phytophthora 406 LQ-GAGFRPKNLRFPVPLSGITGANLE--KTGGV--DECSWY-S-GPSLVEAIDTFAPP--  
Tetrahymena 347 LT-SIGYSEDNLI FVPIPSAFYENIV--EKSKL--PEAGWY-E-GKCLMELLDTLVVP--  
Giardia 306 LRKDIQFG-GEVTFIPVSGIGEDGSHNLTPGA-GCLPDWVRK-HTSLGEEIYKTSIRS  
Leishmania 393 LKQTRIPAEAIIGFCPTISGMAGVNIT--QRGAK---ETPWYH--DLSLIEMIDKCPLE--  
Trichomonas 354 LK-RISW--SAVHFIPVATDKSVLL--NPKE---KMPWY-K-GPTILQAINQIPY--  
consensus 721 lk gfke i fvpvsgmtgenlv k l Wy gpslve id pp

Amphimedon 408 ----PRVVEKPFRC---CIADIFKGGQ-G----AGICVAGKIESGYVQSGETVLVVPAN-E  
Nematostella 486 ----KRDMDKPWF---CVSDVYKGL-G----TGINLAGKMEAGHIQTGDKALAMPAG-E  
Danio 479 ----QRSVEKPFRL---CVSDVFKDQ-G----SGFCVTGKIEAGYIQTGDKVLLAMPN-E  
Xenopus 475 ----QRSIDKPFRL---CVSDVFKDQ-G----SGFCVTGKIEAGYIQTGDRLLAMPN-E  
Sarcophilus 481 ----QRSIEKPFRL---CVSDVFKDQ-G----SGFCVTGKIEAGYIQTGDRLLAMPN-E  
Homo 481 ----QRSIDKPFRL---CVSDVFKDQ-G----SGFCITGKIEAGYIQTGDRLLAMPN-E  
Anopheles 502 ----DRAIDKPFRL---SVSDVFKGT-G----SGFCLCGRIESGMVVCNDKVLVPSK-E  
Coboldia 472 ----VRSISKPFRL---SINDIFKGT-G----SGYCLSGRLETGMISVNDKILIMPCR-E  
Drosophila 468 ----ERADRPLRM---SVSDIYKGT-G----SGFCISGRVETGVLCNDKVLVGSAR-E  
Caenorhabditis 386 ----QPPSDGPLRI---GISDVLKVA-S----NQLVVSCKIESGEVEKDDKVIIMSSV-T  
Trichuris 423 ----KRLVERPLRF---TVSNVFKAQRG---SNFYVAGKVATGSVSNQDKLVVPSG-Q  
Crassostera 517 ----ERPMDKPFRL---ISDVFKGL-G----SGFSVGRVSSGSVQAGDRVLVQPAG-D  
Capsaspora 558 ----ERPIDKPLRF---SVNDIFSRP-----NSGVS LGGKVISGSVQIGDKVLIAPINQE  
Batrachochytriu 469 ----PRSIERPFR---SVQDLFKGAMAAGTSGDVTVSGRIESGSVQLGDTMMAMPIF-E  
Spizellomyces 486 ----QRAVDKPFRL---SIADYFKGGIGAGGGGAVSVSGRIEAGGIQVGEVLMVMPIN-E  
Lichtheimia 424 ----VRALDKPLRM---GVTDFFKGGIGS--SGGVS VGSIDAGHVQVGEQVMVPPG-E  
Rhizopus 419 ----TRLLDKPLRM---RVADFFKGGIGS--SGGVS VAGHIESGSVQVGEQVMVPPGN-E  
Ustilago 419 ----ARQLDSPRL---PVTNVFKGQTAI--ASGVA VSGRVVSGIVQIGDRVRPVPGE-E  
Cryptococcus 419 ----TRPYDSPRL---PLSNVFKGQTAI--ASGVA VSGRLCSGVVQVGDRLRAVPGE-E  
Schizosaccharom 398 ----EKPYRKPRL---SIDVYRSP-----RSVTVTGRVEAGNVQVNVLYDVSSQ-E  
Saitoella 414 ----ARAIEKSLRI---SVQDVYKAGVT---GGSVTISGRVDAGNVQVGETVHAAPSG-E  
Saccharomyces 390 KENEGINKDDPFLF---SVLEIIPSKT---SNDLALVSGKLESIGSQPGESLTIYPSE-Q  
Lachanea 410 KDESSEAIANFLF---SILDVSPSTK---NNEVIVSGKVEAGSIQGETITIIYPSE-Q  
Neurospora 378 ----ARALAKPLRM---TISEVMRTP-Q----SSISITGRIDAGSLQMGDALLVQPSG-E  
Fusarium 374 ---TARALKSPFRM---AISEVFRSQ-L---GTTT IAGRV DAGSFQIGDALLVQPSG-E  
Aspergillus 386 ----SYALDKPLRM---TISDVFRGGVQ---NPLSISGRIDAGSLQVGDQILTMPSG-E  
Dictyostelium 422 ----ERLLNKPFRL---NISDVYKSSSK---GYVAVGKIEAGLLGNGDKILISPGN-D  
Arabidopsis 462 ----RDVSKPLLM---PICDAVRSTSQ---QVVSACGKLEAGAVRPGSKVMVMPSPG-D  
Oryza 448 ----SRDVS KPLIL---PICDVIKSQST---GQLAAGKLETGAIRIGSKVLIISPCG-E  
Pinus 534 ----TRDISRPLRI---PISEVIQSRTL---GQVAASGKLDAGAIKVGTKLLVMPAG-Q  
Physcomitrella 534 ----PRLVARPLRL---TIAEVMKTRTL---GPSAFGKLES GAIHSGTKVRVMPSG-E  
Chlamydomonas 490 ----ERAVSRPLRL---PVSDFVKSQT---GAVVLGKLEGGAMRPGSRVVLVPGPAQ  
Phytophthora 457 ----QRQISKPFRL---TVSDVSKSM-S----LGQTISGRVYAGAAVGDSDLMPIG-L  
Tetrahymena 398 ----TRPVNTPLRL---NIYNSFYQK-----NKGLIQGKVEGGVIFEKSKALIMPQG-L  
Giardia 363 TSQIKGEKTSPTIILFDVTPDTYEGK-----KVFAANCVVESGILQLSDSIVHLPMS-Y  
Leishmania 444 ----SRLNRPRL---SLQDVQGT-----TLYAKVESGRLEFGDTVHFVSE-V  
Trichomonas 401 ----EYDINDSFLM---CISEAVETSR-----NSITVSGRVEGYSVAIGDNVVKVLPGE-Q  
consensus 781 r vekplrl isdvfk gi vtgkieaG vqvgdkvlvvp e

|                 |     |                                                          |
|-----------------|-----|----------------------------------------------------------|
| Amphimedon      | 455 | LTSVKTIFGGDD-----I-SAWAVAGDQVVLTLI-----GID-----          |
| Nematostella    | 533 | KGLLKALNIHDE-----P-TQWACAGDHVTLTLS-----GID-----          |
| Danio           | 526 | TCTVKGILSHDE-----A-LDWAAAGDHVSLTVT-----GMD-----          |
| Xenopus         | 522 | TCTVKGITLHQE-----A-VDWAAAGDHVSLTTLT-----GMD-----         |
| Sarcophilus     | 528 | TCTAKGIMLHDE-----P-VDWAAAGDHVSLTLV-----GMD-----          |
| Homo            | 528 | TCTVKGITLHDE-----P-VDWAAAGDHVSLTLV-----GMD-----          |
| Anopheles       | 549 | QAVVKNITIDEL-----P-QQAFAGDQVSLTLA-----NID-----           |
| Coboldia        | 519 | QTQIKSITIDEG-----S-RTKAFAGDQIVVTLT-----SAVD-----         |
| Drosophila      | 515 | QAQVKSITMNEF-----P-QTCVAFAGDQVSVTLT-----ALD-----         |
| Caenorhabditis  | 433 | AATVKECANNDG-----S--RHCFAAGDYILLTLQ-----GTFE-----        |
| Trichuris       | 471 | TGVVKSILIGED-----EERREAKTGEQCNIILLT-----GLD-----         |
| Crassostera     | 564 | LAVVKAIVTMDDS-----D-NTCGFAGDHVTVVLT-----GMD-----         |
| Capsaspora      | 606 | IGTVKAIIEIH-E-----EGVSWAAAGDAASILLD-----KVD-----         |
| Batrachochytriu | 521 | TGQVRAIEIG-G-----EGVSWAVAGDQVSMVSLG-----GLD-----         |
| Spizellomyces   | 538 | YGTVRALEVS-E-----EAVKWAAAGDSVLMVSLT-----GVE-----         |
| Lichtheimia     | 474 | TGIVKAMQVN-D-----ETSTWAAAGDSVLMVTLT-----GLD-----         |
| Rhizopus        | 469 | MGYIKSMQVN-D-----ESTNWAVAGDSVLMVTLA-----NFD-----         |
| Ustilago        | 469 | SGIVRAIEVD-T-----ESVPWAVAGANATVYVLS-----GID-----         |
| Cryptococcus    | 469 | VANVRTIEVD-D-----DSAPYAVAGQNVTLVLS-----NID-----          |
| Schizosaccharom | 444 | DAYVKNVIRNSD-----PSSTWAVAGDVTVLQLA-----DIE-----          |
| Saitoella       | 463 | PATVKSIMQVN-D-----DIADWAVAGSNVVLNLN-----DID-----         |
| Saccharomyces   | 444 | SCIVDKIQVGSQQGQSTNHEETDVAIKGDFVTLKLR-----KAY-----        |
| Lachancea       | 462 | SVLVDSILSGNDR-----ASVKIGVAGDFVMLKLR-----EAY-----         |
| Neurospora      | 425 | KAYVKSILQVDDG-----EPADWAVAGQNVVLHLS-----NID-----         |
| Fusarium        | 422 | EAYVKSIMVD-S-----DMQDWAVAGQNVSVALT-----NID-----          |
| Aspergillus     | 434 | TATIRSLVD-G-----EPNDWAVAGQNVVLNLA-----NID-----           |
| Dictyostelium   | 470 | ICTIKSIRRN-N-----LESEWAVGGDNVDLSLV-----VEN-----          |
| Arabidopsis     | 510 | QGTIRSLERDSQ-----ACTIARAGDNVALALQ-----GID-----           |
| Oryza           | 496 | VATVKSIERDSN-----SCDIARAGDNVAVSLQ-----GID-----           |
| Pinus           | 582 | GAIVKAIEQDGN-----ELNIAKAGDSVDIGLQ-----GID-----           |
| Physcomitrella  | 582 | IATVKSIELQGG-----QLKTARAGEGVVGLN-----GID-----            |
| Chlamydomonas   | 538 | PFAVRSLEVGGG-----AANLARAGDSCEVALVAHGGGGGGGGAID-----      |
| Phytophthora    | 504 | TLTVKGMEQDGK-----A-CSLARAGDTIEMGVT-----GID-----          |
| Tetrahymena     | 445 | VVTVKEINRE-N-----VKVKYAKVGENIDVHIV-----HKE-----          |
| Giardia         | 416 | LFQIVSIMVDAV-----EADKAVAYDVTLYLAPDKRATKLCNNCDKLDSSVVVKEM |
| Leishmania      | 486 | RVAVKSIQKPTVA-----GPVLVAFAGEMVEISTN-----SS-----          |
| Trichomonas     | 448 | IVRVCDVQLNGE-----PVDFAAGYIADITLT-----TSMN-----           |
| consensus       | 841 | g vk i i wa agd v l l gid                                |

|                 |     |                                                             |
|-----------------|-----|-------------------------------------------------------------|
| Amphimedon      | 486 | -----QTKLALGSLCSPEA-PVSIITSLVRARIIF-NIELPITAGYPVIFHYQSV     |
| Nematostella    | 564 | -----MMHVGVTVLDCPAS-PIRGTCRIKARIIVF-NIEVPIITNGFMVLFHYQNL    |
| Danio           | 557 | -----IIKINVGCVFCDPKE-PIRACTRFRRARILLF-NIELPITQGGFPVLLHYQTV  |
| Xenopus         | 553 | -----IIKINVGCVFCSPNE-PIKCTRFRARVLIF-NFEVPIITQGGFPVLLHYQTV   |
| Sarcophilus     | 559 | -----IIKINVGCIFCGPKE-PIKACTRFKARILIF-NIEIPIITKGGFPVLLHYQTV  |
| Homo            | 559 | -----IIKINVGCIFCGPKV-PIKACTRFRRARILIF-NIEIPIITKGGFPVLLHYQTV |
| Anopheles       | 580 | -----INNISVGIILSDIFH-PVPLATRIILARIVVF-NIKVPIITRGPVLLHHQSL   |
| Coboldia        | 551 | -----VSSIISVGYFLCDLIN-PIPVATRFQVRIITF-NVKVPIITIGCPVLLHHQAL  |
| Drosophila      | 546 | -----INNVTVGCIIISDPQT-PIPVTTTRFQARIIVF-NVKVPIITMGFPVLLHHQSL |
| Caenorhabditis  | 464 | -----PESIQTGSVVVRAGPDTLIPSKKFEVRLVAF-EIAMPKIKGAKAEIYAHSL    |
| Trichuris       | 503 | -----MSAVGSDVLCVPVGS-PVTAVSRFQAKIVTF-DENMPLVKGMQVIVHNGNS    |
| Crassostera     | 595 | -----MAHVNVGSVLCDPQN-PIKSAMRIRARIVIF-NLELPITRGTVVVFFHYQSI   |
| Capsaspora      | 637 | -----PIHFVAGCMLTEVDR-PVPVHSSFRAKIIVF-DVKVPIITGHFVVLVHLYLTF  |
| Batrachochytriu | 552 | -----IQQLSTGSILCDPSA-PVSIITSHFRAQIVTF-DINIPLITIGPIVHHHLGR   |
| Spizellomyces   | 569 | -----IAHNVGSILCDPSA-PVAVTSHFRAQIVTF-DIQIPLTIGVIVVLLHHQSL    |
| Lichtheimia     | 505 | -----IMNLSNGCVICNPQF-PVPVTSFTFAQIVVF-DIKIPIITAGFPVLLHHQSL   |
| Rhizopus        | 500 | -----IINLSNGCVICTGSN-PVPVTSIFEAQIVVF-DVRIPLTLGYQVLLHHGSL    |
| Ustilago        | 500 | -----QIQISVGAVLCPSA-PIALCSSFLAQILVF-EPTYPLVAGTSELFHSSA      |
| Cryptococcus    | 500 | -----PINLSIGTVLCSPTSI-PVPLVTKFTAQILVF-DLQSPIIAGTPVLFHSSM    |
| Schizosaccharom | 476 | -----VNQLRPGDILSDIFH-PVRRVRSFVAEIQTF-DIHGPIILSGSTLVLLHGRT   |
| Saitoella       | 494 | -----PMHLKAGDILCDPLN-PVPTVRAFRRARITF-DLARPIITNGATIVLHRGRI   |
| Saccharomyces   | 483 | -----PEDIQNGDLAASVDYSSIHSACFVLELTF-DMNRPLLPGTFFILFIGVK      |
| Lachancea       | 495 | -----YEDIQSGDLATVGN-DIPTAQEFTAQLLTF-KLDRPLLPGTSFMLFRGGC     |
| Neurospora      | 457 | -----PIHVRVGDVLCDFPAK-PIQCVDFTLTKALAF-DILMPM-----QVDVHRGRL  |
| Fusarium        | 453 | -----PIHIRVGDMLCPTKN-PIINCSDNFVMKAMAF-EHLMPM-----PVDLHRGRL  |
| Aspergillus     | 465 | -----PIHLRSGDVICRPSA-PIANITSFATAKVLAF-DHLMPM-----MVDIHRGRL  |
| Dictyostelium   | 501 | -----PSILRVGCILSDPEK-PIPLSKRFIAQIVTF-TLPIPTNGYQVVFHAHSM     |
| Arabidopsis     | 541 | -----ANQVMAGDVLCDFDF-PVSVATHLELMVLLV-EGATPILLGSQLEFHVHHA    |
| Oryza           | 527 | -----GSKLIAGGILCNPGF-PVPVSNFLELRVLLV-DVTIPIILIGYQVEFHIHVV   |
| Pinus           | 613 | -----SSLMTGGVLCDFDF-PVPVARRIELKVAVL-DIKQPIILFGAEVELHHAHSS   |
| Physcomitrella  | 613 | -----PGMLAPGGVCHPDY-PVPVATRFVQVLLTL-DIRTPILKGSQVILHVHHA     |
| Chlamydomonas   | 579 | -----PSLVAPGAVLCHADF-PAVLVTKFQLRLVLL-DVPVPLLRRQAVTLHHA      |
| Phytophthora    | 535 | -----PSALTTGSILCSIAS-PVQLAKKFEAKIMTMAVEVPLVKGYMTIHMHN       |
| Tetrahymena     | 476 | -----DCEIRSGDVLCSTEH-PIPIISRIFEVELSAF-ELSPYILKGAQIVMYINTA   |
| Giardia         | 478 | PQGSCFVLTGILLQQGQPVSKGVWINNMLATVTKALVLLV-NTPRGISVGDVYDCYVSS |
| Leishmania      | 516 | -----VTGLYPGCVGCEPNL-LIHSSTDFEAHIQTFRTLTKSILPGASFTIYVHAL    |
| Trichomonas     | 480 | -----VEQFAIGSAIFDPKK-KLQLSNRFTAHLRTF-DIKKPIIQGTPLVFRHVA     |
| consensus       | 901 | 1 G vlc p pv i srf ariiif ei lpi g vilh v                   |

Amphimedon 535 SEPAVIKLLS QVSKTSG-DVIRKKPRCLTKNSSAIVEIEISR-----PLSLELYSD  
Nematostella 613 SEPATIKKLHALLNKSTG-EVIQRKPRCLPKNSNAEVELQTSR-----PVCVELYKD  
Danio 606 SEPATIRKLVSVLHKSSTG-EVTKKKPKCLSKGQNAVVEIQTOR-----PVMERYKD  
Xenopus 602 IEPATIRKLVSVLHKSSTG-EVMKKKPKCLTKGMNAVIELQTOR-----PIAVELYKD  
Sarcophilus 608 SEPATIRRLISILHKSSTG-EVTKKKPKLLTKGQNALVELQTOR-----PIALELYKD  
Homo 608 SEPAVIKRLISVLNKSTG-EVTKKKPKFLTKGQNALVELQTOR-----PIALELYKD  
Anopheles 629 IEPATIRKLLKALHKGSTG-EVTKKNPRCLGNNSCALVEIEFOR-----PIGMERYAD  
Coboldia 600 VEPATIVKIKALHKGSTG-EVTKKNPRFLGNNSCALVEIETK-----AICIEKYAD  
Drosophila 595 IEPAVVCKLTASIHKSSTG-EVVKKKPRCLGNNSCALVELETSR-----PICIERYAD  
Caenorhabditis 514 CVPCTFTNLLYTIKNSNG-EILKKGPRFIAGKASAVVEIETFEY-----DIAIETFTS  
Trichuris 552 QQPGYLSKLI AEVSKSTG-KVTKSKPRCLARNSSGVVEVTTEK-----PMCFETSHV  
Crassostera 644 TEPAIIRKRLNQLNKNKSTG-EVVKKNPKCLVKNSSAVVEIEFER-----PVCLEMYKD  
Capsaspora 686 NEPAVITRLETLLDRSTG-EIVKHHPRALPKNSSAIVTITL-Q-----RPVCLELYEN  
Batrachochytriu 601 SEAGYIERLVSLLNKSTG-AVVKKNPRALGQSVTAVVEIRT-Q-----RPMCLETFTQ  
Spizellomyces 618 TEQSTITKLSALLNKSTG-ETIKKNPRALPKNVTAVVEIKT-S-----RPCLETFKD  
Lichtheimia 554 DEPASIIKLLCTLDKSTG-EVTKRNPRHLGKGMTAKVKIQLSN-----RAIPLFTFKQ  
Rhizopus 549 DEPASIIKLVILDKSTG-QVVKKNPRCLTKGMTAKIQVKLSQ-----RAIPLFTFKD  
Ustilago 549 NIAATLTELVSILDKTSTG-SVTKAKPRVLTGCTAMVKVTVKAGGQAGQSSGPILEDAKT  
Cryptococcus 549 NLPATISKLVSIK--G-QVVKERPRVLQKGTAMVELSLRPS-SSGKISSIPLTATD  
Schizosaccharom 525 VTSVSL-KI-----V-TVNNKRSRHIASRKRALVRI SFLD-----GLFPLCLAEAE  
Saitoella 543 NEAARIQALVATIDRADG-QIIKKKPRHLASGQSAVVEIAFLG-----NGIPMETFKD  
Saccharomyces 533 EQPARIKRLISFIDKGN--TASKKKIRHLGSKQRAFVEIELIE-----VKRWIPLLTAHE  
Lachanea 544 EQPARIKKLVSIKCKDPKILKVKHLGSDQAIVEIELIE-----KRRRIPILTIEK  
Neurospora 502 HAAGKIEAIDALDKVTG-EVTKKKPMIVKPGTVSRVRTLHS-----KVPLEAG--  
Fusarium 498 HSAGQIVSIAATLDKVTG-AVVKKKARVVQPGGVARVSVKLAA-----KVPLEAG--  
Aspergillus 510 HVPGRISRLVATLDKSGS-SVTKKKPKIVPPGSVARIVVEMDQ-----AVPLEAP--  
Dictyostelium 550 EEPATITRLISLLDS-NG-AVSKKNPRCISDTCTALVEITLGR-----LSCLELYSS  
Arabidopsis 590 KEAATVVKLVA MLDPKSTG-QVTKKSPRCLTAKQSAMLEVS LQN-----PVCLETFSSE  
Oryza 576 KEAARVTKIVALLD-KAG-KPSKTAPRFLKSKQNAV VQVTLDA-----PVCVEEFSK  
Pinus 662 KEAAKIVQILALDLPKSTG-LVRKKAPRLLTANQSALIEVLP HR-----GICIEEYCN  
Physcomitrella 662 RQPARVDQLVSLDPPKG-TVLRQPRHLTANQSAIVVIVPDE-----GVCIEKYS  
Chlamydomonas 628 REEGHLSALVALDPRSTG-EVVKARPRCLTRGQSALVEVTSR-----GLVLEEYAH  
Phytophthora 585 DEPVNITRLVSM LSK-TG-EVEKKKPRCITRERSAVVQITCHR-----KICLEEFAN  
Tetrahymena 525 KCPGYIKKITA LDKANG-QITKKNPKCIRNNECAIVEVCI EK-----ENCMELFSN  
Giardia 527 RVEARVHKINAQINPSTQ-EVIRKNPPLVGSAYVRMTLIFNV-----AVIVKEFSK  
Leishmania 568 TRVHVVALISKMDGKSTG-NWSKGMVKCVPPAAQAMMLFRAES-----PVALEPATE  
Trichomonas 529 DLPLKIESFTAQLDPKTK-KTIKKGIKFLARQFIEATFSIES-----PIPIDTAES  
consensus 961 epa i kll lldk tg vikkpr l aivei 1 le y d

Amphimedon 586 CKDLGRFMLRYAGNTVAAGLI IKIL\*-----  
Nematostella 664 YKDLGRFMLRYGGNTIAAGVITQV\*-----  
Danio 657 YKELGRFMLRYVGSSTIAAGVVEIKE\*-----  
Xenopus 653 FKELGRFMLRYSGSSTIAAGVVEIKE\*-----  
Sarcophilus 659 FKELGRFMLRYSGSSTIAAGVVEIKE\*-----  
Homo 659 FKELGRFMLRYGGSTIAAGVVEIKE\*-----  
Anopheles 680 FKDLGRIMLRVEGVTTIAAGLVTEIVK\*-----  
Coboldia 651 IKELGRVTLRVAGVTIAAGLVTKILK\*-----  
Drosophila 646 FKELGRVMLRVAGVTIAAGMVKIR\*-----  
Caenorhabditis 565 CRALGRVTFRAGNTIAAGIVEKVI TPQ\*-----  
Trichuris 603 SKELSRVTLRFKGSSTIAAGVVELK\*-----  
Crassostera 695 YKDLGRFMLRQGGHTIAAGLVEEVLTKSKTEENSTE\*-----  
Capsaspora 737 IKDMGRITLRS SGATI GAGIITELIPLAPASSSTPGLLV\*-----  
Batrachochytriu 652 TKELGRFMLRNGSTVAAGIVTDILSFE\*-----  
Spizellomyces 669 SKELGRFMLRAGPVTVAGIVLEILSFERGLPVERT\*-----  
Lichtheimia 606 NKQLGRIMLRGGETIAAGVVEILTFGS\*-----  
Rhizopus 601 NKQLGRIMLRGGETIAAGVVEILSFE\*-----  
Ustilago 608 NKEMARVLMRMNGETVAAGIVVEAQN\*-----  
Cryptococcus 605 NKEMGRVLI RRNGETIAAGVM MELLG\*-----  
Schizosaccharom 568 CPALGRFILRRSGD TVAAGIVKELC\*-----  
Saitoella 595 SKDLGRVILRTGGDTIAAGIVDEL F\*-----  
Saccharomyces 586 NDRLGRVVL RKGRTIAAGKISEITQ\*-----  
Lachanea 599 SKHLGRIVLRKEGRTVAAGVVE SLD\*-----  
Neurospora 551 ----QVVVLRSGGQTV AAGLLE\*-----  
Fusarium 547 ----QVVVLRSGGQTV AAGLLE\*-----  
Aspergillus 559 ----TRIVLRSGGDTVAAGLLE\*-----  
Dictyostelium 600 YRQLGRFTLRNGGVTTIAAGLIT EFDNPPKSSSPLTTTTTTSNKK\*  
Arabidopsis 641 SRALGRVFLRSSGR TVAMGKVTRI IQDS\*-----  
Oryza 626 CRALGRAFLRS GGSTIAAGVVT RVLGQDQ\*-----  
Pinus 713 YKPLGRVTLRATGKTIAAGVITRI IEQQ\*-----  
Physcomitrella 713 FRALGRIALREGGKTIAAGVITDILERK\*-----  
Chlamydomonas 679 YRALGRVALREGGRTLAVGVV TQLLE\*-----  
Phytophthora 635 YRQLGRFTLRDRGKTIAAGIITQIIA\*-----  
Tetrahymena 576 FKSFGRVVLRKMN TIGVGSITKIL\*-----  
Giardia 578 SKLMGRMILRS DNRSVGLGKIERISEK\*-----  
Leishmania 619 CRALGRFVLQQDGETVAGGLVTRVVDK P\*-----  
Trichomonas 580 SRSFGTFIVRTGGETVGF GGIISVLQAK\*-----  
consensus 1021 k lgrimlr ag tiaaGlvteil

Figure S4. Sequence alignment of Ski7L1s from diverse eukaryotes.

```

Amphimedon      1 MARHRNVRRLDFDEE-RDFGDIYGRSFED-EVAISPATASQFMYPHGNT-GIALSSYMKP
Nematostella    1 MSRHRNIRNYAYEDD-MS-EDVYGHSVEDYDMAVSPPTAHQFMYSRGDNHPDLFSNYMGG
Danio            1 MSRHRNVRGYNVEDD-FEDDDMYGQSVED-DYCISPATAAQFIYSRQDSRQARHVEET---
Xenopus         1 MARHRNVRGYNVDDD-FDDDDLYGQSVED-DYCISPATAAQFIYKRD-R-QTSFTEP---
Sarcophilus     1 MARHRNVRGYNVEDD-FEDDDLYGQSVED-DYCISPSTAAQFIYSRHDK-PSSFVEP---
Homo            1 MARHRNVRGYNVEDD-FEDDDLYGQSVED-DYCISPSTAAQFIYSRRDK-PS--VEP---
Anopheles       1 MSRHRNVRNAVYDDY-DDDDYQYQSVED--DCISPSTASQWIYDRAKG-QQSMSSEFLAN
Crassostrea     1 MSRHRNVRTMNFEDDEYFDEDEVYGHSYDD-SYCVSPATAAQFTFNRRERDV--NLSSYMEE
Lichtheimia     1 MSRHRAVRNLDIDDV-LDEDTYSDDYDEN-----E-----
Ustilago        1 MSRHRAVRNLDLDEE-LAEDDYDEDPYD-----N-----
Cryptococcus    1 MSRHRFVRNIDLNDE-LDDGDEEV-----
Dictyostelium   1 MSRHRFLKNMDGDDF-EDFKEEDDLGEYDDEVYDVYDVVVEKF-----
consensus       1 MsRHRnvrnl ydde ddddiyg sved e cisp ta qfmy r e

```

```

Amphimedon      58 HP--LETQSEKLPSSAGASGA-----PT-
Nematostella    59 RFGSVEEKEEEEEEN-----SLTSSQDYKRPQLDALSEAKLSSCLDQLNSILGDDC-
Danio           56 ---VEEAEEEEEE---MPTSPTMTSTLDSLQQGRLYSCLDQMRTVLGDSI-
Xenopus         54 ---LEEEDEYEEP-----DKLKPNDSSL SAADQARLYSCLHEHMREVLGESV-
Sarcophilus     55 ---VEEYDEDTKE-----PTNSISNHQLSGIDQARLYSCLDHMREVLGDDV-
Homo           53 ---VEEYDEDLKE-----SSNSVSNHQLSGFDQARLYSCLDHMREVLGDAV-
Anopheles       57 NRDIEEEDDELA AETGREGPAHKRRDSECFQMPELNDEDRARLMSCMDEIRDIVGETC-
Crassostrea     58 --GIP EEEDES DPEP-----LSDSGRDNLKLD DVEQAKLNSCKEEIVNVIGDTI-
Lichtheimia     30 -----LDEGLNDEDRQEL ENGLSHVRNIVGE--D
Ustilago        30 -----LS-----PEDHDAMMEAYAQTLEVI GPTVS
Cryptococcus    24 -----GMSAEETAQMNR AVSARNL-LKDV T
Dictyostelium   27 -----
consensus       61      lee e e                l d akl scld lre vlgd i

```

```

Amphimedon      79 ---QPNQPSQPALPSQYLRSEPSIKKPDKDSNVLFIPNCTVASM-----
Nematostella    112 ---HEPTAVDAILKHFNV-----EKALDYIFNRETKQDKSC-----ESNKDFHSKE
Danio           102 ---PDSTLTQAALKYDCDP-----HRALDFILSENTNTQAPS-----ARTNPQLEPN
Xenopus         98 ---MEQVMIDAVLKSQFDV-----AKALDIVFKQDCNKNIKP-----AN----QDII
Sarcophilus     99 ---PDQTMIEAVLQSKFDV-----EKALAMVLEQDKKQT-----KS----EEAI
Homo           97 ---PDEILIEAVLKNKFDV-----QKALSGVLEQDRVQSLKD-----KN----EATV
Anopheles       116 ---SDRQMV EAIMKH DYC-----SKALDEILNSNKTPPAALGAKSGSK-----L
Crassostrea     105 ---PEHIVSQAVVKHQYNI-----QAALNELLNQSEAPKQRPQRPDRRANRQDEDD
Lichtheimia     58 IGISDTEIKEALWYYYFDR-----EETVNWVFDKVAKIKAE-----EK-----Q
Ustilago        55 NGFTEREIKDVLWDAYFDV-----DSAVTQLV EEKSRREAKA-----EK-----D
Cryptococcus    49 PPISDNEIADSVWHYWF DG-----EKAAAWLRQDREKKGE-----
Dictyostelium   43 PDITYPE--IEKVLMDFDYNV-----DDAIDFILNGGLNNKGKK-----KN-----N
consensus       121      d l dailk fdv          dkal ll

```

```

Amphimedon      120 -----ASAKSGSDFISLAKSRENPTKIST-----
Nematostella    156 H----L---TIEQKAKILRHL---AKNRQHHQSNKA-----
Danio           146 T----T---AAPQKGFLLHNSNKTVSSAHSC-----KPL
Xenopus         138 T----E---RPTKEAIFSSKKN-LNNDSCSFKKKSS-----
Sarcophilus     136 S----M---GKATKGVLFCSSEVSTDNVQCFFPSSVNHS-----GCSSNPF
Homo           137 S----T---GKI AKGVLFSSSEVSADNVQSSYPQSANHL-----DYSSKPF
Anopheles       158 T-----A---GAAMEKDLKASSTRGNLAPNNQ-----
Crassostrea     154 DFDSFLESLEADGGDTSIFSNLTKMSPKILHFGPS-QNVVQNNLKT VKTLSPEKSNSTAN
Lichtheimia     98 K-----KKA AKAAAAAASKDRKPRYRRPPAKL-----
Ustilago        95 R-----QKQESGE--MQM NDEDE-----PTIKA-----
Cryptococcus    84 -----APPSYLEP-----
Dictyostelium   83 K-----KPPQAVN--I-INNNNNNKKKS-EPVNT-----
consensus       181      a kg if l n p

```

Amphimedon 144 --CPPSLGELMKT**PS**SGPPSLGELMKT**P**STGPPSLGELMKT**P**STGPPSLGELMKT**P**SSSGP  
Nematostella 182 -----TQLAD**A**T-----  
Danio 176 KQ---NPSYNLSD-----LLAVPEPNM**T**K-----PKAQ**N**PP**P**GF**G**SLAKDHLK**G**V  
Xenopus 166 -VCSTVSS**M**--SK**N**-----E-----  
Sarcophilus 175 EFCDSVPKDGLSC**N**SSNILSHRLLHKKKKLDR-----PHSD**K**K-----  
Homo 176 DFASSVGKYGLSH**S**-S**V**PTHCLLHRKKKLD**T**-----RKSE**K**K-----  
Anopheles 183 --PAAL**G**SA-----RFAL**P**K-----VQFGAV**G**G-----  
Crassostrea 213 DFCEPARTS-----SQLAKKHE**G**AP  
Lichtheimia 126 -----Y--ADVQ-Q**S**P-----S-----SSSSPM**G**S-SS**L**Q  
Ustilago 116 -----F--K**Q**L**S**-LQRDRRAE**I**RA-----GRGMP**Q**GKA**Q**GL**R**  
Cryptococcus 92 -----T**P**L-Q**Q**PRHR**P**K**I**L**V**-----PPSQ**P**T**Q**A**Q**E**D**I**Q**  
Dictyostelium 107 -----N--K**S**T**S**-**K**-----G**Q**RR**P**R**K**ST**S**EN**N**  
consensus 241 s

Amphimedon 202 PSLGELMKTSS----**S**G**P**T**S**L**G**E**L**M**K**TSSS-----G**P**T**S**L**G**E**L**M--**K**T  
Nematostella 189 -----V**N**K----**S**K**Y**I**I**L**G**S**K**I**K**D**G**E**N**-K**P**L**P****N**--R**I**D**P**H**Q**L**L**C**T**P**L****Y****V**L**G**L**V**--**D**I  
Danio 218 S**S**H**N**L**G****N****Q****S**T----**T**G**Q****S****S**L**A**H**L**I**A****Q**H**E**H-K**H**S**T****V****P**-**P**L**V****P****S**T**G**L**S**T--**D****Y**T**I****P**L--**T**T  
Xenopus 178 -----S**F**A**F**D**I**----**T****P****N**L**S**L**S**T**L**I**S**A**S****P****N**-**Q****T****Y****N****I****T**-**E****P**---**G****S**L**S****N**-**I****N**L**L****D**L**I**--**T**D  
Sarcophilus 213 -----L**E**S**C**K**S**----**S**K**E**L**S**L**A**D**L**I**N**D**M****P**H-**D**S**F****Y****E**S**L****N****S****Q****P****K****V****F****S****R****S****D**L**E****N****M****I**--**S**D  
Homo 213 -----L**E**S**C**K**L**----**T**K**E**L**S**L**A****N**L**I**H**D****M****S****R**-**D****S**---**C****E****S****Q****P****S****V****R**L**S****S****T****D****S**L**E****S**L**L**--**S**K  
Anopheles 204 -----**G****S****G****G****G****S****G**--**N**L**N**D**L****V****K****Q****R****M****K****Q****N****S**L**S****D****P**-**P****V**-----**D**K  
Crassostrea 233 **Q****T**H**K****G**L**F****Q****G****E****S****T****G****E****N****K****S****R**L**S**L**A****Q**L**A**A**K****R****K****P**-**S**S**L**A**Q**L-**A**L**A**K**K****G**G----**S**L**A****Q****I****T**--**S**E  
Lichtheimia 147 **S**----**L**A-----**Q**R**A****S**----**T**---**N****N****K****P****T**-----**Q**K**A****S****S**L  
Ustilago 145 **G**----**L**A**T**--**G****G**-----**R**A**G****M**A**K****R****N**L----**A**---**G**L**A****P****N**-----**F****V****Q****D****S****Q****S****S****S**L  
Cryptococcus 119 **P**-----**P**L----**T**---**A**L**Q****R**L-----**T**L**S****R****R****Q****G****S****P**A  
Dictyostelium 126 **N****S****N****N****S****N****N****N****D****D****D****D****D****N****N****K****N**--**K****N****N****N****N****N****K****N**---**N**---**G****Y****K****P****S**-----**S**L**A****Q**----**D**L  
consensus 301 s slg lm h i p l lm t

Amphimedon 239 **S****S****S****G****P****P****S**L**G**E-----**L**M**K**T**S**S**A****G****P****P****S**L**G**E-----**L**M**K**T**S**S**S****G****P****P****S**L**G**E**L**M**K**T**S**S**S****G****P**  
Nematostella 232 **T**-----**P****G****Q**-----**P****I****P**-----**S**L**G****T****N****K****F****K****A****G****N**A-**N**E**L**L**T****T**-**S**L**S**  
Danio 268 **S****P**----**L****G****S****F****N****G****P****S****G****L**-----**S**T**L****Q****G****P****N****V****P****P**L**S****V****G**-**S**A**A****T**  
Xenopus 221 **S****K**----**V****G****S****D****T****G****K****G****S****D****M**L**D**A**K**L-**S**E**I**A-----**S**L**E****T****K****C**L**H****K**A**P****N**L**Q****P**L**L****T****G**-**N****N****S**  
Sarcophilus 261 **S**-----**V****D****G****K**L**L****G****A****D****S**-**S****V****S****P**-----**S**L**D****I****S****E****Y****K****G****G****P****D**L**K**A**L****M****Q****T**--**K****R****S**  
Homo 257 **N**-----**L****D****A****D**L**L****R****P**H**A**-**S**E**C****I**-----**S****K****D****D****S****A****F****K****E****I****P****D**L**K****T****I****I****K**-**G****T****T****P**  
Anopheles 235 **N****T**----**I****T****G****C**A**E****G****G****G**-----**K****E****N****N****E****P****K****K****A****S**L**D****S****P****K****Q****A****T**  
Crassostrea 284 **Q****Q**--**T****P****S****V****A****Q****P****A****G****Q****K****V****S****V**L**D****S****G****V**-**K****V**L**P**L**A****Q**L**A**T**K**H**K****V****G****T****S****V****E****E****K****K****P****S**L**A**L**L**A**A****K**-**Q****K****E****T**  
Lichtheimia 166 **Q****S**L**A****Q****K**A**A****G**-----**Q****R****G****M****S****A**L**Q****T**L**A****S****R****Q****Q****R****T**  
Ustilago 176 **P****S****S****N****A****P****P**A**P**-----**S****K****A****V****S****K**L**S**A**L**A**A****R****S****S**A**K****R**  
Cryptococcus 138 **S****P****A****P****S****S****S****V****G**-----**E****K****P****M****S****K**L**A**L**L**A**Q****K****R****R**E**A**A  
Dictyostelium 166 **S****A****I**-----**T****N****T****I****S****N****I****K****I****N****D****K****E****F****S****F****Q**  
consensus 361 s g l k p l l k s

Amphimedon 286 ---**P****S**-----**L****G****E****L****M****K****T****S****S****A****G****P****P****S**L**G**E**L**M**K****T****S**S**A****G****P****P****S**L**G**E**L**M**K****T****S****S****T**-----**G****P**  
Nematostella 261 **L****G****T**-----**N****T****F****R****A****G****N**-**A****K****E**L**L****T****T**-----**P**L**S****S**L**A**L**P****Q**-**S****G**-----**Q****A**  
Danio 299 ---**L****S**L-----**G****S****S****V****P****A****G**L**G**A**T****P**-**S****S****C**L**L****T****C**-----**S**L**S****N**L**A**L**Q****D**-**S****Q****R****S**--**A****P**L**P**  
Xenopus 266 **M****D****V**L**Q****Y****K****Q****E****N**---**M****E****N****S****G**--**C****S**L**K****D****I****Q**-**D****D****W****F****P****T**-----**K****M****S****Q****D****D**-**K****V****F**---**H****K****E****G**  
Sarcophilus 298 **D****S****S**L**S****I****E****N****N**L**L****P****I****V****E****N****I****P****V****Q****N****M****E****S**-**I**-**N****S****F****Y**L**T****N**-----**T**L**E****N****M****T**L**D****N**-**N****V****S**H**L****Q****N****K****K**A  
Homo 295 **N****N****S**L**Y****I****Q****N****N****S**L**S****D****F****Q****N****I****P****V****Q****D****S**L**G****S****S****N**-**N****P**L**Y**L**T****S**-----**S**L**E****N****M****T****V****D****N**-**L****N**A----**S****K****E**  
Anopheles 265 -----**L**A**Q****F**A**A**L**S****I****G**A**S****A****P****V**---**P****M****K****S****F****T**-----**N**L**S****D**L**A****K****H**H-----**L****E**  
Crassostrea 340 **S**-----**E****G****T****M****I****S****K****S****S****G****V**-----**S**L**A****D**L**A**A**K****E****T****K****N****Q****S****I**---**L****G**  
Lichtheimia 193 **A****T**-----**T****T****S****S****T****T****T**-----  
Ustilago 203 **S****A****D**-----**N****V**---**P**L**H****A****G**-----**T****R****E****R**-----**P**L**S****P****A****S****T****S**-----  
Cryptococcus 165 **A****A****A**-----**T****T****T****S****E****T****I****Q****S****G****I****V****S****P****Q****T****S****R****Q**-----**P****S****A****S****G****T****Q****P**-----  
Dictyostelium 187 **S**-----**L****Y****K****N****N****K****D**-----  
consensus 421 v s t l ls

Amphimedon 328 PSLGELMKTPST-GPP-SLGELMKTSSTGPPSLGELMKTS---STGPP-----  
Nematostella 291 PITGSL-----SLSSLATNTSRTVNVNDLL-----T  
Danio 338 VSISSLSSVMRGSGLPL---GVPVQKSSASLSLAELIQE---HQDSSPKL-----Y  
Xenopus 307 DLFSSLSSVLQNT-----ESDQSVSKYGSPSLADLIHE---HYEMNPLQ-----D  
Sarcophilus 350 ELSGTVLSAQQCCKKHNLKDRVQFSKCEPSPSLTELFQE---HKENNPSQ-----Y  
Homo 344 TEVGNVSLVEQSAKNHTFKNDNLQFSQCEPSPSLTELFQE---HKENNISQ-----C  
Anopheles 297 SK-GTPPSFP-----ATATSPRFVAVPQLFKQ-----  
Crassostrea 369 KKGASLTQLLNTSKEL-----HLEKSPKTSLAQLAQK---HKQTSNITATVNEKLSKE  
Lichtheimia 202 TNTTA-----TPS---SSPKPSLAALAQKSSASKGRTS-----  
Ustilago 225 SPSGH-----SPS---ATPAPVS-----ASTASSGRTS-----  
Cryptococcus 195 SSGTQ-----SPS-----  
Dictyostelium 195 -----  
consensus 481 gsl sl l

Amphimedon 371 -SLGEL-----MKTSSSGPPTS LGELMKTTSSAGPPSLGELMKTSSSGPPSL  
Nematostella 317 TSLSSL-----AL-----SGTSKGPDLQRAS--AGRYASST-DQLLTTSLSSLAL  
Danio 383 DSLPGL-----NISTN-SFHVTGTQNNAS-Q-----KPAL-----  
Xenopus 349 ISFISP-----QQ--NPHSKGLATDSVLS-QL--SGQSIAALDMPSSLSLSSLSV  
Sarcophilus 398 FSLSDL-----CNQSSASFTDKSLGSTPLS-QI--T-QYQSSTGIPELTGSLSSLAF  
Homo 392 FTLSDL-----CNQSSASFTDLSLGSFPPLS-QL--ANRCQSSPGISELTGSLSSLAF  
Anopheles 322 -----PFACASPTAVAGGGGTAAPPS-QS--TD--QQVLGQGTGWILDLSKA--  
Crassostrea 419 KSLAQLALKHKNESCTETDVEQKKGISLA---QL--ASKHKTPL--SQSGISLMQVAK  
Lichtheimia 233 -L-AHLA-----TRSRPSETSARPTS-----SNQGLSGL-----AKLASKS--  
Ustilago 250 -KLAALA-----AARTGTGVSAANVI-----VPP---AL-----QTSGSSI--  
Cryptococcus 203 -----  
Dictyostelium 195 -----  
consensus 541 sl l ls q l slssl

Amphimedon 415 GELMKTPSTGPPSLGELVKENIGLAKERDKGQ-----  
Nematostella 360 ADSS----LSKPSLAQGLSQHNPOA-----TSE---DT-----F--S--LPLSS  
Danio 412 --NIPPRLSEAPSLSDLMSQHQASLGPQLLALKNENG---SI-----T--A--LRKPA  
Xenopus 396 SNTLNT-KATPVSLSDLFAQSNKHVKNHHN-----LLSHT  
Sarcophilus 446 SKASPTRDLENLSLSDLIAESINEVDKSQIKK-----DP-----S--M--LDLPE  
Homo 441 HKASPTRDLENLSSELIAETID-VDNSQIKK-----ES-----F--E--VSLSE  
Anopheles 364 -----LIK-----KKPDAT--TV-----A--T--GSGKS  
Crassostrea 471 QKEERETETKNVSLSDLVKQNKESSDSDNPQSKDGQ---QV-----T--T--VSQPS  
Lichtheimia 267 ----NVSDKPSLS-----PSLE---KQRQQQQPVKETMKDV--TPKKAFHITNDQPANP  
Ustilago 282 ----GASDAPAKPLSKLQQRML---ANKQQRQAATPEA-KEA--AATQAAE-EEARSRPQ  
Cryptococcus 203 -----QLEKKPLSKLAQKMA---AARAAREEAAAAAKSSKLEKNSVGDQMEGDEPLPS  
Dictyostelium 195 -----  
consensus 601 slselv l

Amphimedon 447 -----GFVDLSVLLRKAPQS-----DT---KKSAL-----  
Nematostella 393 LSIRATSQPK-----KQLSPSFKPVNIVDQCQ--HTYTQRKIYG-----  
Danio 456 VPKPHPLSLNRSIDLSTLMSKTSFPV-----SRSPALLNFT----  
Xenopus 431 VPL---TEPDKVIDLSALINSPEKNENGLVLNE-----KSLSTESKSPENYLKKT  
Sarcophilus 487 IKS---SAVDSNIDLSVLIKTPFIFPKPIENQSN--ILISGAKVPSSKLVKNSSFSKENK  
Homo 481 VRS---PGIDSNIDLSVLIKPNDFVPPKPVVDPSI--APSSRTKVLSSKLGKNSNFAKDNK  
Anopheles 382 LKQGTASVD-HIQ-----YGFIDCD-----ITETVKPTIDEFCTID-  
Crassostrea 517 A----Q---GLSLRDLVKESSEGN--VLKDKSKKIKQLKGNDTQTVDSTEDSDVDFHEGK  
Lichtheimia 313 LCAK--PSAAAANFLFMHMYPO--QA-----  
Ustilago 331 TCFG--S---DLPISLFPAPDHA-----  
Cryptococcus 253 LSS-----PADPMLSLFSPFATS-----  
Dictyostelium 195 -----  
consensus 661 l v ls ll p

Amphimedon 469 --E---SSHLSSPSLSLVNPPSAKPMSSGVGVVICRQG---NRSSLQ-----  
 Nematostella 430 ----SPSKQRHPKRKSFSSAIK-SRPTMFALTLCCHKS---MMSSHG-----  
 Danio 491 -----EETASLKKRVF-AKPSIFALAMCVPV---RCSKSR-RGR--VT-----  
 Xenopus 479 SSKQMHVSKGSKKCTYRARIK-ARPSAFALTLCFTY---IPKTCKKNIL--MI-----  
 Sarcophilus 542 KSKKGYITRKPAFSLSWTKALA-ARPSAFASTLCLRY---PPKTCKRHTF--DL-----  
 Homo 536 KNNKGSLTRKPPFSLSWTKALA-ARPSAFASTLCLRY---PLKSKRRTL--DL-----  
 Anopheles 418 -----ASAVLERDLSHRTLIT-SS--PMGVVVGIRY-----  
 Crassostrea 566 TAE-DLVIEKLSLDFDALVNIIT-KGPS CFGKVICGRF---GAFKNKLKNNDSPS-----  
 Lichtheimia 334 -----NT--TTTPSPIPAFS--SI-----  
 Ustilago 350 -----QE--SKTPSAIGLVSVSAI----AGSSKDAVDQLVAPLSLLRRV  
 Cryptococcus 271 -----PKPKLKPTHSPFFSIIITSTSSQGGAPGPAKDHLPE-----  
 Dictyostelium 195 -----  
 consensus 721 s i rps fg icv

Amphimedon 507 -GI--TDKVM-----SRLKEQYFLEPRF-NFSTPSPDELIILTEQSKI FHK\*-----  
 Nematostella 468 ---FATKRKRLGCPAPSLVQAYSLIKPF-DFSTLSPDDIVKQQQKKRFGNKI\*-----  
 Danio 527 HSAFLYSRQMERVKERVQCAPLHHIEPF-SFNTPSPDDIVKANQRKAFTRD\*-----  
 Xenopus 527 HQY-PHN-DLVELTR---ENHNPTLVVVF-DFQTPSPDDIVKENQKKAFAR\*-----  
 Sarcophilus 590 YKTFLYSRQVQEVKDK-EIGPLKVIITPF-DFKSASPDDIVKANQKKAFTR\*-----  
 Homo 584 YKTFLYSRQVQDVKDK-EISPLVAITPF-DFKSASPDDIVKANQKKAFTR\*-----  
 Anopheles 446 -----RKRKLPVHISHYFPKYTTVVVF-RFDVPSPDVVLGHIKKYRP\*-----  
 Crassostrea 615 QGPFYSYAKQKQITCH-HSPEHRVKLVVVF-DFSTPSPDDIIKEKQKRAFTRPKERNDSK\*--  
 Lichtheimia 349 -GRAFYEAVKTS-----DDTIKAF-SFDVPSPDIVMEAQSQRSQQLRKS-----  
 Ustilago 388 PGRSPFTLYVQGAD--EGSGLEIETVKK-AFAGPSPDDIVMQAREGTRLGAK\*-----  
 Cryptococcus 308 PTSANLHAPL-----ITDVDVLVKQFEQAFASPDEIVLRKRQGRAGTADMVTAVKKQ  
 Dictyostelium 195 -----SDGTIIPF-DFKTPSPDDTILNKQKQAFKPKHNSTDNDT  
 consensus 781 y k m i pf df tpSPDdivk qkkaf k

Amphimedon -----  
 Nematostella -----  
 Danio -----  
 Xenopus -----  
 Sarcophilus -----  
 Homo -----  
 Anopheles -----  
 Crassostrea -----  
 Lichtheimia -----  
 Ustilago -----  
 Cryptococcus 361 ATGTGIKPKVK\*--  
 Dictyostelium 234 NDKDKNNKINKK\*  
 consensus 841

Figure S5. Sequence alignment of Ski7L2s from diverse eukaryotes.

```

Capsaspora      1 MSRHRNLRHLDYSDDYDVDDQDYDEDDDYGDDRYAGRT-----GGASFGA---YFDTSNA
Spizellomyces  1 MSRHRNIRNINLDDELD---EDYDDDDYYDEEYDGDYTYEAQGGHTVAS---FIDTEQK
Saitoella      1 MSRHRDVRNLDLDEEM-----YDDDDYYDGD-----G-----HDMTYEE---QEOMEAG
Lachanea       1 MAKYYDEDDMDYHSDVPEFQDESEFDDYLNDEEYGLM-----NDMFPRA-----
Neurospora     1 MARHQNIRNLDYEAEL---EEY--GAFSDEE-EEEL-----SPED---QVRMREG
Fusarium       1 MSRHRIVHTFDTNDIV---SEFDGDDYEEEG-EDEL-----SPED---RQAMDQG
Aspergillus    1 MSRLRVK-N-----VSYDEDDYD-DG-YDSP-----DPEE---QEILEQC
Arabidopsis    1 MPRK---GLSN-FDDYDDGFDDDDDAFDYDYDVIDEHE-----EEA
Physcomitrella 1 MPRK---WRQ--SDFDDDGYYDDYDEEDYEEEEYLEDKEPTSTSSVVPGQSQSFTSTTQP
Chlamydomonas  1 MTKGKRGAFYD-DDDLDDGYDDDYDDYEEEEPAPAPKKAELAKPQAGGK---QPAQTAP
consensus      1 Msrhr lr ld ddld edydeddy y sp ena

```

```

Capsaspora      53 TNATADDLPDLSTLTLKEKDLLREARAKIEPVVGNTVTNAEIVDAILHYN---F-DVEKA
Spizellomyces  55 PVTETR-----GAINL---VEEVNRIVGDDFPTEQISDVLQDSG---N-DIERA
Saitoella      42 VAAVHDAL-----NGVP--GITLKEIRETLYYYY---F-DLEKS
Lachanea       45 -----KKEMAD--YQGWNNLAVKLAIFDQN---F-DFNQA
Neurospora     42 TAQVLEALG-----VEAH--KVPKQIEESLWHYY---W-DVDKT
Fusarium       44 TAEVRAALG-----TEAN--KVTTQIEEALWHYY---Y-DVDKS
Aspergillus    35 TAEVLAQLL-----SGEPSVTATRDEVQEALWHYY---N-DVEKS
Arabidopsis    39 AAEPKEEIA-----KTQGLWRCAICTYDNVETM
Physcomitrella 56 TATEVNEPE-----TEEGLWACPVCTFDNSLDS
Chlamydomonas  57 KAAPSAAPA-----RA-----
consensus      61 ta      l          i ealwhy      f dveks

```

```

Capsaspora      109 IVWLLLEGYDPDEDADN--DQVSGPIAWLPSFLFP---TPTSDIAGGRV-----
Spizellomyces  97 VNLLYDQG-PRIAP-----PPGFPVAPPPGFALKSDSRQPASRIAGLKSKDKTLTIIQAE
Saitoella      75 IAWLLEQHSVKKPAAKPKAAPTASKASGPRLVID-----EFDDE-----
Lachanea       74 MIELKRIYRKKQFAQPK-QEEE---KKLSKLEILARKRA-----
Neurospora     76 ITYLISKYIDPPKPKAKTAPPKTAPKQDAAI-----
Fusarium       78 VTYLIKTFIAPAPKPAKTPEGMSVSFSASRLL-----GTGAD-----
Aspergillus    71 VNYLRGKKTKEMKKKQNPAPPVAAKGVPAYPLP-----
Arabidopsis    67 FVCDICGVLR-HPVAGNQ-SINKNTDVF-----
Physcomitrella 84 LTCDICDTPR-EDLSEKV-SDPSTSSKEKAY-----
Chlamydomonas  68 -----
consensus      121 i wll          l

```

```

Capsaspora      152 -----VRSARVGGPMCAE-----AEESSEPPSSSE
Spizellomyces  151 DGVAFRTAYPVTVEISKLPLKDTGTNSQKRQLVDGIESMESDSGKTIDVETSRSRPQVEQ
Saitoella      114 -----PPRKIARI---SA---SVIIARHGITWGMG-----ST
Lachanea       109 -----SAV-----DQ
Neurospora     107 -----ASAS---RQ---SFAHLFRDLPWGNI-----PP
Fusarium       117 -HGRLSSGYNFNMKLPV---DK---VPACFFNDMPWLNI-----PQ
Aspergillus    105 -----PVASSPSS---HF---SAKDFFRDSPWLNV-----PA
Arabidopsis    93 -----
Physcomitrella 113 -----
Chlamydomonas  68 -----
consensus      181

```

```

Capsaspora      177 NSQSTPATAAAAPASLSLSLGLSMAAPPSANAVAGQSFGMLSSLGAGLSG-ASSLGSTTN
Spizellomyces  211 ASTTVPDIK-----EQAGQTHS-----PTDSFRLIDARSSAKHDAVSATSSANS
Saitoella      140 AS-I-----EPVHPPR---VPPGGWGLLG-----
Lachanea       114 -KQTSSHT-----SNKSASLLSRLK-G-----
Neurospora     129 ERQA-----VLIPP---QLP--AGLLGSG-A-----
Fusarium       152 ERQT-----HFIEPE---RPR--GLLGSGE-G-----
Aspergillus    131 HRKG-----EILIEPL---YPR--LGLLGAPES-----
Arabidopsis    93 -----
Physcomitrella 113 -----
Chlamydomonas  68 -----
consensus      241          p          gll a      g

```



Capsaspora 236 AFGSLASLSTF-----SSLSSLGTGPS-----SLIAPNPSSS----SGGVAPTSIASLS  
 Spizellomyces 256 MYGSLPAPSSSLGSSLLSSLPASGQSLAPFAFPQGLAGAPPSEQ---R--AKETAVSSLS  
 Saitoella 161 -----SGKMSKLAA-----LAKARKEAQAASKAEKGAAPGLASV-  
 Lachancea 134 ----KTTPSRLGSFHDSTLSS-----HRSSSEV----ESDAAKPSLA---  
 Neurospora 151 -----PPKMSKLQQ-----LAAARKKKKAEKKSASGEVEQTQVKMT  
 Fusarium 174 -----APKMSKLQA-----LAAARKKKKTEEKKEQEKLEKGVSKLS  
 Aspergillus 155 -----GGKMSKLAA-----LAAARKKKKETDKAASGAPTPPGE---  
 Arabidopsis 93 ----YAVESRCKEPVVSKLAK-----  
 Physcomitrella 113 -----VVTEVQRVSPSLAKALFN-----  
 Chlamydomonas 68 -----AGAAASKLAQSLCDPPPPGPGGKAQRGAKP-----  
 consensus 301 klskl laaar i l

Capsaspora 281 SLTAPLSLLSSSSP-----SSLTPAPPTMSLLSG-----APGLLS  
 Spizellomyces 310 Q-AQPLSSLLLQSPSSNLSQTNSLFLPQPGTLLSSLHQS----TSSLTKSGDAIGVLG  
 Saitoella 195 -----S---LLSK-----IT-----A  
 Lachancea 167 ----LLMRKQ---RRVHTSLEPTQSLPESRTETSPRSSSLAFLLAGR----R  
 Neurospora 186 ELTVN-----DNQASKENR---P---LAGV-----FG-----K  
 Fusarium 209 VAGSE-----KE-----NQSP-----FN-----Q  
 Aspergillus 187 -PGTP-----DRTPTVESKSLASLS---LRER-----LA-----G  
 Arabidopsis 110 -----  
 Physcomitrella 130 -----  
 Chlamydomonas 97 -----  
 consensus 361 1

Capsaspora 316 ASSIPAMSTSLASLSLNAPSPNPPSLSALS-----TAPIPAETSALSLSLASLSLASLS  
 Spizellomyces 364 NSLAPENA----VKSVPFPVPAVPQSQSLS----SLLSNTRSP--SGALPLSSLA--SVS  
 Saitoella 203 AKTAPKAAAAP-DTPTEPPAPQAPAEPAVSEPESSQPSSIPPPQSPSPPP-----VVA  
 Lachancea 209 RTVSPQNS-----LASKLMALK-----  
 Neurospora 208 RVKISETTAQG-RI-----PLTMAEPTRPEIQAQ--AP---E-----  
 Fusarium 223 RQQIPTP-----ASQAQPTQYDMDIDHEENEY---K-----  
 Aspergillus 212 NGKAQKPSESG-QL-----PRTLRRGTPSESPLAQKKLSPEPSK-----  
 Arabidopsis 110 -----  
 Physcomitrella 130 -----  
 Chlamydomonas 97 -----  
 consensus 421 p p

Capsaspora 368 LMTFAASEPPQOSTAPKATLS-TSSVVGQAQTAAPITGTAPSVNVAIAKPKV-----  
 Spizellomyces 412 LGNTMAATPL--SLSNLSLSTGSLGATQK--SSINDAPGLSQL-ASNSANIMSGTDAI  
 Saitoella 255 DDVDMSEAPLLVSPT---PSP---S---SPEHPTFEP-----  
 Lachancea 226 ----TERKVANGSKAELH-T-----TPA-DEREKPVIVHE-----  
 Neurospora 240 ----A-----TPS---Q---HQEEDPIDPEPAV-----  
 Fusarium 251 ----K-----PTP---A---HKDEFTLDSFPGV-----  
 Aspergillus 250 ----AKSPEMIPGEPTRKP---C---AGEEETERPK-----  
 Arabidopsis 110 -----  
 Physcomitrella 130 -----  
 Chlamydomonas 97 -----  
 consensus 481 p v

Capsaspora 418 -----SAEVANGSLQLA---MPSQLAQSIKAKPSSTDHTRVSSVALRNVL  
 Spizellomyces 468 RSALAAFSLQAGNASEGSLGTVPAASTKEPLSVFPTPFKTLPNSGIGKPDAAE---TSIP  
 Saitoella 283 -----ALVEATPSVFA-----  
 Lachancea 256 -----EKTDPWSSFQKLR---ES-----QG-QGNTS-----L  
 Neurospora 258 -----A-PPKAQPSAFA-----  
 Fusarium 269 -----EIVTGTPSALS-----  
 Aspergillus 277 -----ASIRAPSTFA-----  
 Arabidopsis 110 -----  
 Physcomitrella 130 -----  
 Chlamydomonas 97 -----  
 consensus 541 ps a



Capsaspora 721 SPRPGGGHRAPRMDILEEYKKRAGAKAHLNMVVVGHVDAGKSTLMGHILFQLGHVSRRTL  
 Spizellomyces 702 S-----PKLKRINVAEEYKKNRAEKESLNLVVVGHVDAGKSTLMGHVLYLLGEVNERTM  
 Saitoella 391 APAPPIKIARKKKNVVEEYAKV-DVKESANFVIGHVDAGKSTMMGRLLYDYGAVDERTI  
 Lachancea 404 TP---T----KPRNPFVDIQSYVSSRKPHLNFFVVLGHVDAGKSTLMGRLLYDVGAVNYKLI  
 Neurospora 347 DDT--PLPKSRNLNVLSEFEKQ-KGKKTASFVVVGHVDAGKSTMMGRLLLDLNVVDQRTV  
 Fusarium 361 VDA--PPPKSGLDVLKEYENS-SNKRSISFVVVGHVDAGKSTLMGRLLLELKFVEKHTI  
 Aspergillus 374 QEK--VAVKSKNLDVLSYHKS-QRKRAMNFVIGHVDAGKSTLMGRLLADLKAVDQRTL  
 Arabidopsis 291 GPKSQSKHK-P--EEWMLLDKESDALSQLNLAIIVGHVDSGKSTLSGRLLHLLGRISQKQM  
 Physcomitrella 285 YGLSLESYE-P--EPWMLKDANKDSRQLLHLIVVGHVDAGKSTLMGRILLHLLGRVRSQKEM  
 Chlamydomonas 273 S-----GSSSGSSKPPHLVVLGHVDAGKSSLMGRLLHDLGLVSAKEA  
 consensus 901 k k mdvl ey k k lnfvvvGHVdAGKStlmGrll dlq v rtl

Capsaspora 781 HKYETESQKLGKASFAFAWVLDDETAERARGVVTIDVAMTSFETKTKRITLLDAPGHRDFI  
 Spizellomyces 756 KKYERDAEKMKKSSFAYAWVLDDETEERTRGVVTIDVAITKFHTPHRKFTLLDAPGHRDFI  
 Saitoella 450 QKFRKESKMGKGSFALAWVMDSTDEERARGVTVDIATNQFETPKRKFTILLDAPGHADFV  
 Lachancea 457 RKLKKESEQAGKGSFHLAWVMDQTSSEERDRGVTVDICTSDFETDRATFTIILDAPGHRDFV  
 Neurospora 404 DKLRKEAEKIGKTSFALAWVLDQRHEERSRGVTIDIAATNRFETETTSFTIILDAPGHRDFI  
 Fusarium 418 DRYRQAEKSGKQSFALAWVMDQRSEERERGVTVDIATNHFETEKTSFTIILDAPGHRDFV  
 Aspergillus 431 ERYQREAEKIGKGSFALAWVLDQGTSEERARGVTIDIAMNKFETENTVFTIVDAPGHRDFV  
 Arabidopsis 348 HKYEKEAKLQKGSFAYAWALDESAEERERGITMTVAVAYFNSKRHHVLLDSPGHKDFV  
 Physcomitrella 342 HKNEKESKQQKGSFAYAFVLDGAEERARGVTMTVAVAHFETPKLRVLLDAPGHRDFV  
 Chlamydomonas 316 HKFQRDAAAAGKGSFAWVLDERPEERERGVTVDMVAMTRFATNRFVAVTLLDAPGHRDFV  
 consensus 961 hky keaeklgkGsfAlAwvlDet eER RGvTidvam kFet h rftllDaPGHrDFv

Capsaspora 841 PNMISSGAAQADVAVLVVNAVGEFEAGFEG-----GGQTRHALLVRS LGVNQLIV  
 Spizellomyces 816 PNMSGAAQADVAILVVDATPGEFETGFDS-----GGQTRHAVLLRSLGV TQLIV  
 Saitoella 510 PNMIAGAAQADFVVLVIDASTGGFESGFNV-----RGQKEHALLVRS LGVQNLIV  
 Lachancea 517 PNAITGISQADAAVLTIDCCVDAFESGFSL-----DGQKEHTLLARSLGARHIVV  
 Neurospora 464 PNMIAGASQADFAILVIDASTGAFESGL-----KGQTRHSLLRSMGVSRIIV  
 Fusarium 478 PNMIAGASQADFAILVIDANTGAYEKGL-----KGQTRHVLLLRSLGVQRLVI  
 Aspergillus 491 PNMIAGASQADFAVLVIDSGTGNFESGL-----RGQKEHALLVRS MGVRQRII  
 Arabidopsis 408 PNMIAGATQADAAAILVIDASVGAFFAGFDN-----LKGQTRHARVLRGFGVEQVIV  
 Physcomitrella 402 PNMISSGASQADAAAILVVDASIGAFFAGLEGE-----GQGRGQTRHAQLVRS LGVEQLIV  
 Chlamydomonas 376 PNMIAGAAQADAALLLV DGSPPGFEAGFSESGSGLHGAPGGQTRHAALARS LGIEQMAV  
 consensus 1021 PNmiaGasQAD AiLvidas gafEtGf rGQTrEHallvRslGv qliv

Capsaspora 892 AVNKLDACDWSKARFDELVARLSLFLKTSGYRLDNVTFVPSGLIGENLIE-RKEPKLTQ  
 Spizellomyces 867 AVNKLDVVDWSKTRFDEISEKLSHFLSQVGFQRKQKVAFIPTSGYTGENLVK-RESDKLNA  
 Saitoella 561 AVNKLDSDWNHERFEEIEMQVSQFLTNAGFDPQNVQYI PCSGLTGENLVK-RSAEPALT  
 Lachancea 568 AMNKMDHEGWYPTRFDFIKWELSEFFKDIGIKKEQVSWVTCSSLSGEGVYN-IKRPLGID  
 Neurospora 513 AVNKLDTVNWSQERFDEITHQVSGFLTATGFQPKNIAFVPSGLHGDNLVR-KSTDPAAS  
 Fusarium 527 AVNKLDVWGSQERYDEIAQQVSGFLAGLGFVSKNIDFVPI SGLNGDNLAR-RTEDPAAS  
 Aspergillus 540 AVNKMDAVEWSRDRYEEIEQQISSFLT TAGFQAKNIAFVPCSGFRGDNVTR-RSDDPNAS  
 Arabidopsis 460 AINKMDIVGYSKERFDLIKQHVGSFLQSCRFKDSSLTWIPLSAMENQNLV AAPS DNRLSS  
 Physcomitrella 457 AVNKLDVDFSKERFDFIRGTLQPFKQCGFKDGS LQWVPVSASEGQNLTMAS TESALKA  
 Chlamydomonas 436 VVSKLDTCGYDQSRFESISRAALLPYLKS VGFKESGLQWLPAAGPLGENLVGPPQDPALKA  
 consensus 1081 avnKlD vdwskeRfdei ls fl gfr nv fvpvsgl genlvk rsed l t

Capsaspora 951 WYS--GPTLVEQIDQFQPP-----ERPDKPLRFVSNDFISRP-----NSGVSLGGKVI  
 Spizellomyces 926 WYS--GSTLVEQIDAFEAP-----QRAVDKPFRLSIADYFKGGIGAGGGGAVSVSGRIE  
 Saitoella 620 WFN--GPTVLGALESIAPT-----ARAI EKSLRISVQDVYKAGVT---GGSVTISGRVD  
 Lachancea 627 WYN--DP SLVDCL EDVAKKLNKDESSEAI EANFLFSILDVSP TS---KNEEVIVSGKVE  
 Neurospora 572 WYT--GKTLVEELEAEPSE-----ARALAKPLRMTISEVMRTP-Q----SSISITGRID  
 Fusarium 586 WYT--GPTLIEALENSEPT-----TARALKSPFRTAISEVFRSQ-L----GTTTIAGRVD  
 Aspergillus 599 WYT--GRTLVEELEATEPY-----SYALDKPLRMTISDVFRGGVQ----NPLSISGRID  
 Arabidopsis 520 WYQ--GPCLLDVDSVKSP-----DRDVSKPLLMPICDAVRST----SQGQVSACGKLE  
 Physcomitrella 517 WYN--GPCLIELVDSLKPP-----PRLVARPLRLTIAEVMKTR----TLGPSAFGGKLE  
 Chlamydomonas 496 WWGPGRPCVTD AIDAFAPR-----ERAVSRPLRLPVSDVFKSK-----TGA VVLGGKLE  
 consensus 1141 Wys gptlve ld p raidkplrlsi dvfkt g vslsGkve

Capsaspora 998 **SGSVQIGDKVLI**APINQEIGTVKAIEIHE-EGVTWAAAGDAASILL-----DKVD  
 Spizellomyces 978 **AGGIQVGEVVLVMP**INEY-GTVRALEVSE-EAVKWAAAGDSVLM**SL**-----TGVE  
 Saitoella 669 **AGNVQVGETVHAA**PSGEP-ATVKSMQVND-DIADWAVAGSNV**VLNL**-----NDID  
 Lachancea 681 **AGSIQPGETIT**IYPSEQSVLVDSILSGNDRASVKIGVAGDFV**MLKL**-----REAY  
 Neurospora 619 **AGSLQMGDALLVQ**PSGEK-AYVKS**LQVDDGE**PADWAVAGQNV**VLHL**-----SNID  
 Fusarium 634 **AGSFQIGDALLVQ**PSGEE-AYVKS**IMVDS**-DMQDWAVAGQNV**SVAL**-----TNID  
 Aspergillus 647 **AGSLQVGDQIL**TMP**SGET**-ATIR**SLEVD**-G**EPND**WAVAGQNV**VLNL**-----ANID  
 Arabidopsis 568 **AGAVRPGSKVM**MP**SGDQ**-G**TIRSLERDS**-QACTIARAGDN**VALAL**-----QGID  
 Physcomitrella 565 **SGAIHSGTKVR**VM**PSGEI**-ATVKS**IELQG**-QQLKTARAGE**GV**DV**GL**-----NGID  
 Chlamydomonas 545 **GGAMRPGSRV**VL**VP**GPAQPF**AVRSLE**VG**G**-GAANLARAGDSCE**VAL**VAHGGGGGGG**GAID**  
 consensus 1201 aGsvqiGd vlvmpSge atvkslev e e wavAGdnvll L id

Capsaspora 1047 **PIHF**AVGCMLTEVDR**PV**VHSS**FRAKI**IIVFDV**KVPI**THGF**HV**VLH**YLTFNE**PAVITR**LET**  
 Spizellomyces 1026 **IAHIN**VGSILCD**PSAPVAVT**SH**FRAQIV**TFDI**QIPL**TIGV**PV**VLH**HQSLTE**QSTIT**KL**SA  
 Saitoella 717 **PMHLKAGDIL**CD**PLNPVPTVRA**FRARIIT**FDLARP**ITNGAT**IVLHRGR**INEAARI**QALVA**  
 Lachancea 731 **YEDIQSGDL**ATT**VGNDIPTAQE**FT**AQLLTFKLDR**PL**LP**GT**SFMLFR**GGCE**QPARI**KKL**V**S  
 Neurospora 668 **PIHVRVGDIV**CD**PAKPI**QCVD**FTL**KAL**AFDIL**MPM----**QVDVHRGR**LHAAG**KIEA**IDA  
 Fusarium 682 **PIHIRVGDMLC**PT**KNP**INCSD**NFVMKAMAF**EHL**MPM**----**PVDLHRGR**LHSAG**QIVS**IAA  
 Aspergillus 695 **PIHLRS**GD**VICRPS**APIANIT**SFTAKVLA**FDH**LMP**S----**MVDIHRGR**LHVP**GRI**SRL**V**A  
 Arabidopsis 616 **ANQVMAGDVL**CH**PDFV**SV**VATHLELM**VL**VL**EGAT**PILLGSQ**LE**FHVH**HAK**EAATV**V**KLVA**  
 Physcomitrella 613 **PGMLAPGGV**V**CHPDY**P**VPVAT**RF**EVQ**LL**TLDIR**TP**ILKGSQ**V**ILHVH**HAR**QPARV**D**QLVS**  
 Chlamydomonas 604 **PSLVAPGAVL**CHAD**FPAVLVTK**F**QLRLV**V**LDV**VP**PLLRGQAV**TL**HAHVAREEGH**LSAL**V**A  
 consensus 1261 pihi Gdmlc p pv v s f akil fdv vPi g vvlhrgrlthe ari rlva

Capsaspora 1107 **LLDRST**-GE**IV**KK**HPRAL**PKNSS**SAIV**TITL-Q--**RPV**CLELYENIK**DMGRIT**LRSS**GATI**  
 Spizellomyces 1086 **LLNKST**-GET**IKKNPRAL**PKN**VTAV**VEIKT-S--**RPI**CLETFKDS**KELGRF**MLRAG**PVTV**  
 Saitoella 777 **TIDRAD**-**GQI**IK**KKPRHLAS**G**QSAV**VEIA**FLG**--**NGIP**ME**TFKDSK**DLGR**VILRT**GG**DTI**  
 Lachancea 791 **IVCKKDP**KK**ILKKKVKHL**GSD**QAAI**VE**IELIE**KKRR**IPILTIE**KS**KHLGR**IVLR**KEGR**TV  
 Neurospora 724 **LLDKVT**-**GKV**T**KKKPMIV**K**PGTV**SR**VRVTL**-H--**SKV**PLE-----**AGQ**R**VVLR**SGG**QTV**  
 Fusarium 738 **TLDKVT**-**GAVV**KK**KARV**V**QPGV**AR**VS**V**KL**-A--**AKV**PLE-----**AGQ**R**VVIR**SGG**ETV**  
 Aspergillus 751 **TLDKGS**-**GSV**I**KKKPKIV**PP**GSV**AR**IV**V**EM**-D--**QAV**PLE-----**APTR**IV**LR**SGG**DTV**  
 Arabidopsis 676 **MLDPKT**-**GQPT**KK**SPRCL**TAK**QSA**ML**EV**SL-Q--**NPV**C**VE**TF**S**ES**RALGRV**FLR**SSGR**TV  
 Physcomitrella 675 **LLDPKK**-**GT**VL**RQRPRHL**TAN**QSAI**V**VI**VP-D--**EGV**C**IEKY**SDF**RALGR**IAL**REGGKTI**  
 Chlamydomonas 664 **LLDPRT**-**GEEV**K**ARPR**CL**TRGQ**SAL**VEV**TS-S--**RGLV**L**EEY**A**HYR**AL**GRV**AL**REGGRTL**  
 consensus 1321 lldk t g ivkkkpr l gqsaivei l vple y kalgRvmlRsgg Tv

Capsaspora 1163 **GAGIIT**ELIPLAPASS**STPGLLV**\*  
 Spizellomyces 1142 **AAGIV**LEILSFERGL**PVERT**\*---  
 Saitoella 834 **AAGIV**DEL**F**\*-----  
 Lachancea 851 **AAGV**VE**SLDF**\*-----  
 Neurospora 774 **AAGL**LE\*-----  
 Fusarium 788 **AAGL**LE\*-----  
 Aspergillus 801 **AAGL**LE\*-----  
 Arabidopsis 732 **AMGK**V**TRII**QDS\*-----  
 Physcomitrella 729 **AVGIV**TD**IL**ERK\*-----  
 Chlamydomonas 720 **AVG**V**VTQ**LL**E**\*-----  
 consensus 1381 aaGivd li
